# Supplementary material
Source: PubMed Central journal article supplement (PMC7990699)
Supplement: NIHMS1646784-supplement-1.pdf [file NIHMS1646784-supplement-1.pdf]

## Supplementary Note

### Oligonucleotides for genome editing

- *Lactococcus Lactis*

|                                                                               |                                                                                               |
|-------------------------------------------------------------------------------|-----------------------------------------------------------------------------------------------|
| Rifampicin resistance 4bp mismatch:                                           | C*G*AgagataccaccaggtcctaaggcagagaaacgacgtttgtTGCTaagctcagacaaaggattatgttggtccataaatttgacaac   |
| Rifampicin resistance 1bp mismatch:                                           | C*G*AgagataccaccaggtcctaaggcagagaaacgacgtttgtTgaaagctcagacaaaggattatgttggtccataaatttgacaac    |
| Streptomycin resistance (K56R):                                               | G*A*AAGACGTACACGCGCGAATTTACGAAGCGCTGAGTTAGGTTTTCTAGGAGTCATTGTACCAACACGAGTTGCTACTCCACGTTTTTTGT |
| NNKx5 oligo Spectinomycin resistance                                          | C*G*GTCACCAACAACAACAAGTGCTGCAAAGCGAAGACGMNMMNMMNMMNNAACTTTAGTAACGCGGTTAATTGAAACTACGCGTTCT     |
| 5x1NNK oligo Spectinomycin resistance (AA 32)                                 | C*G*GTCACCAACAACAACAAGTGCTGCAAAGCGAAGACGMNNTCCACCTTTTACAACCTTTAGTAACGCGGTTAATTGAAACTACGCGTTCT |
| 5x1NNK oligo Spectinomycin resistance (AA 31)                                 | C*G*GTCACCAACAACAACAAGTGCTGCAAAGCGAAGACGACGMNACCTTTTACAACCTTTAGTAACGCGGTTAATTGAAACTACGCGTTCT  |
| 5x1NNK oligo Spectinomycin resistance (AA 30)                                 | C*G*GTCACCAACAACAACAAGTGCTGCAAAGCGAAGACGACGTCCMNNTTTTACAACCTTTAGTAACGCGGTTAATTGAAACTACGCGTTCT |
| 5x1NNK oligo Spectinomycin resistance (AA 29)                                 | C*G*GTCACCAACAACAACAAGTGCTGCAAAGCGAAGACGACGTCCACCMNNTACAACCTTTAGTAACGCGGTTAATTGAAACTACGCGTTCT |
| 5x1NNK oligo Spectinomycin resistance (AA 28)                                 | C*G*GTCACCAACAACAACAAGTGCTGCAAAGCGAAGACGACGTCCACCTTTMNNAACTTTAGTAACGCGGTTAATTGAAACTACGCGTTCT  |
| Spectinomycin resistance mutation matching <i>E. coli</i> (G27D matches G30D) | C*G*GTCACCAACAACAACAAGTGCTGCAAAGCGAAGACGACGTCCATCTTTTACAACCTTTAGTAACGCGGTTAATTGAAACTACGCGTTCT |
| NNKx5 oligo Spectinomycin resistance Validation 1 (RTNAR)                     | C*G*GTCACCAACAACAACAAGTGCTGCAAAGCGAAGACG CCGCGCATTCGTACGAACTTTAGTAACGCGGTTAATTGAAACTACGCGTTCT |
| NNKx5 oligo Spectinomycin resistance Validation 2 (NGTRF)                     | C*G*GTCACCAACAACAACAAGTGCTGCAAAGCGAAGACG AAACCTAGTACCATTAACTTTAGTAACGCGGTTAATTGAAACTACGCGTTCT |
| 5x1NNK oligo Spectinomycin resistance Validation 1 (V28P)                     | C*G*GTCACCAACAACAACAAGTGCTGCAAAGCGAAGACGACGTCCACCTTTAGGAACTTTAGTAACGCGGTTAATTGAAACTACGCGTTCT  |
| 5x1NNK oligo Spectinomycin resistance Validation 2 (K29I)                     | C*G*GTCACCAACAACAACAAGTGCTGCAAAGCGAAGACGACGTCCACCAATTACAACCTTTAGTAACGCGGTTAATTGAAACTACGCGTTCT |

|                                                          |                                                                                                      |
|----------------------------------------------------------|------------------------------------------------------------------------------------------------------|
| Spectinomycin resistance validation R at 28              | C*G*GTCACCAACAACAACAAGTGCTGCAAAGCGAAG<br>ACGACGTCCACCTTTCCTAACTTTAGTAACGCGGTAA<br>TTGAAACTACGCGTTCT  |
| Spectinomycin resistance validation R at 28, NN at 30-31 | C*G*GTCACCAACAACAACAAGTGCTGCAAAGCGAAG<br>ACGACGATTATTTTTTCCTAACTTTAGTAACGCGGTAA<br>TTGAAACTACGCGTTCT |
| Spectinomycin resistance validation R at 28, N at 31     | C*G*GTCACCAACAACAACAAGTGCTGCAAAGCGAAG<br>ACGACGATTACCTTTCCTAACTTTAGTAACGCGGTAA<br>TTGAAACTACGCGTTCT  |
| Spectinomycin resistance validation R at 28, N at 30     | C*G*GTCACCAACAACAACAAGTGCTGCAAAGCGAAG<br>ACGACGTCCATTTTTTCCTAACTTTAGTAACGCGGTAA<br>TTGAAACTACGCGTTCT |
| Spectinomycin resistance validation NN at 30-31          | C*G*GTCACCAACAACAACAAGTGCTGCAAAGCGAAG<br>ACGACGATTATTTTTTACAACCTTTAGTAACGCGGTAA<br>TTGAAACTACGCGTTCT |
| Spectinomycin resistance validation N at 31              | C*G*GTCACCAACAACAACAAGTGCTGCAAAGCGAAG<br>ACGACGATTACCTTTTACAACCTTTAGTAACGCGGTAA<br>TTGAAACTACGCGTTCT |
| Spectinomycin resistance validation N at 30              | C*G*GTCACCAACAACAACAAGTGCTGCAAAGCGAAG<br>ACGACGTCCATTTTTTACAACCTTTAGTAACGCGGTAA<br>TTGAAACTACGCGTTCT |
| Spectinomycin resistance validation R at 31              | C*G*GTCACCAACAACAACAAGTGCTGCAAAGCGAAG<br>ACGACGCCTACCTTTTACAACCTTTAGTAACGCGGTAA<br>TTGAAACTACGCGTTCT |
| Spectinomycin resistance validation N at 30, R at 31     | C*G*GTCACCAACAACAACAAGTGCTGCAAAGCGAAG<br>ACGACGCCTATTTTTTACAACCTTTAGTAACGCGGTAA<br>TTGAAACTACGCGTTCT |
| Spectinomycin resistance validation MNR at 29-31         | C*G*GTCACCAACAACAACAAGTGCTGCAAAGCGAAG<br>ACGACGCCTATTCATTACAACCTTTAGTAACGCGGTAA<br>TTGAAACTACGCGTTCT |
| Spectinomycin resistance validation M at 29              | C*G*GTCACCAACAACAACAAGTGCTGCAAAGCGAAG<br>ACGACGTCCACCCATTACAACCTTTAGTAACGCGGTAA<br>TTGAAACTACGCGTTCT |
| Spectinomycin resistance validation M at 29, R at 31     | C*G*GTCACCAACAACAACAAGTGCTGCAAAGCGAAG<br>ACGACGCCTACCCATTACAACCTTTAGTAACGCGGTAA<br>TTGAAACTACGCGTTCT |
| Spectinomycin resistance validation M at 29, N at 30     | C*G*GTCACCAACAACAACAAGTGCTGCAAAGCGAAG<br>ACGACGTCCATTCATTACAACCTTTAGTAACGCGGTAA<br>TTGAAACTACGCGTTCT |
| Spectinomycin resistance validation SNNRK                | C*G*GTCACCAACAACAACAAGTGCTGCAAAGCGAAG<br>ACGTTTACGATTATTTGAAACTTTAGTAACGCGGTAA<br>TTGAAACTACGCGTTCT  |
| Spectinomycin resistance validation FNGGR                | C*G*GTCACCAACAACAACAAGTGCTGCAAAGCGAAG<br>ACGACGTCCACCGTTAAAACCTTTAGTAACGCGGTAA<br>TTGAAACTACGCGTTCT  |

|                                           |                                                                                                      |
|-------------------------------------------|------------------------------------------------------------------------------------------------------|
| Spectinomycin resistance validation FKGR  | C*G*GTCACCAACAACAACAAGTGCTGCAAAGCGAAG<br>ACGACGTCCACCTTTAAAACTTTAGTAACGCGGTAA<br>TTGAAACTACGCGTTCT   |
| Spectinomycin resistance validation VNGGR | C*G*GTCACCAACAACAACAAGTGCTGCAAAGCGAAG<br>ACGACGTCCACCGTTTACAACCTTTAGTAACGCGGTAA<br>TTGAAACTACGCGTTCT |
| Spectinomycin resistance validation PNGGR | C*G*GTCACCAACAACAACAAGTGCTGCAAAGCGAAG<br>ACGACGTCCACCGTTCGGAACCTTTAGTAACGCGGTAA<br>TTGAAACTACGCGTTCT |
| Spectinomycin resistance validation V-GGR | C*G*GTCACCAACAACAACAAGTGCTGCAAAGCGAAG<br>ACGACGTCCACCTACAACCTTTAGTAACGCGGTAAATTG<br>AAACTACGCGTTCT   |
| Spectinomycin resistance validation FIGGR | C*G*GTCACCAACAACAACAAGTGCTGCAAAGCGAAG<br>ACGACGTCCACCAATAAAAACTTTAGTAACGCGGTAA<br>TTGAAACTACGCGTTCT  |

- *Escherichia coli*

|                                                         |                                                                                                     |
|---------------------------------------------------------|-----------------------------------------------------------------------------------------------------|
| 4bp mutation conferring SDS resistance (tolC targeting) | A*G*CAAGCACGCCTTAGTAACCCGGAATTGCGTAA<br>GTCTGCCGCTAAATCGTGATGCTGCCTTTGAAAAAT<br>TAATGAAGCGCGCAGTCCA |
|---------------------------------------------------------|-----------------------------------------------------------------------------------------------------|

- *Mycobacterium smegmatis*

|                                             |                                                                                                    |
|---------------------------------------------|----------------------------------------------------------------------------------------------------|
| 1bp Streptomycin resistance (targets rpsL): | G*T*CAGCTTCACGCGCGACCTTCCGGAGCGCCGA<br>GTTCCGGCTTCCTCGGAGTGGTGGTGTAACGCGCGT<br>GCACACGCCGCGACGCTGC |
|---------------------------------------------|----------------------------------------------------------------------------------------------------|

- *Lactobacillus rhamnosus*

|                                           |                                                                                                    |
|-------------------------------------------|----------------------------------------------------------------------------------------------------|
| 3bp rifampicin resistance (targets RpoB): | A*C*GAGTCAAGCCACCAGGTCCAAGGGCAGACAGA<br>CGCCGTTTGTCCGTTAATTCGCCAACGGATTGGTCT<br>GATCATGAACTGTGACAG |
|-------------------------------------------|----------------------------------------------------------------------------------------------------|

- *Caulobacter crescentus*

|                                     |                                                                                                        |
|-------------------------------------|--------------------------------------------------------------------------------------------------------|
| Rifampicin resistance 4bp mismatch: | C*G*CGGGTCAGACCGCCCGGGCCGAGGGCCGAGAG<br>ACGACGCTTCCTCGTGATTTCCGACAGCGGGTTCGT<br>CTGGTCCATGAACTGCGACA   |
| Rifampicin resistance 1bp mismatch: | C*G*CGGGTCAGACCGCCCGGGCCGAGGGCCGAGAG<br>ACGACGCTTGC GG GTGATTTCCGACAGCGGGTTCGT<br>CTGGTCCATGAACTGCGACA |

Oligos used for fluorescence quenching:

|                                         |                                                                                                            |
|-----------------------------------------|------------------------------------------------------------------------------------------------------------|
| Quenching oligo: tolC-f.null.mut-5'IBFQ | /5'IBFQ/TGGACTGCGCGCTTCATTAATTTTTTCAAAGG<br>CAGCATCACGATTTAGCGGCAGACTTACGCAATTCC<br>GGGTTACTAAGGCGTGCTTGCT |
|-----------------------------------------|------------------------------------------------------------------------------------------------------------|

|                                           |                                                                                                          |
|-------------------------------------------|----------------------------------------------------------------------------------------------------------|
| Fluorescent oligo: tolC-r.null.mut-3'6FAM | AGCAAGCACGCCTTAGTAACCCGGAATTGCGTAAGT<br>CTGCCGCTAAATCGTGATGCTGCCTTTGAAAAATTA<br>ATGAAGCGCGCAGTCCA/3'FAM/ |
|-------------------------------------------|----------------------------------------------------------------------------------------------------------|

### Primers

- MASC PCR (*L. lactis*)

|                                |                      |
|--------------------------------|----------------------|
| Rifampacin 1bp PCR F WT        | AGAGAAACGACGTTTGTG   |
| Rifampacin 1bp PCR F Mut       | CAGAGAAACGACGTTTGTG  |
| Rifampacin 1bp PCR R<br>Common | CGTTCAGTTGGTGAATTACT |

- dsDNA validation of genome integration (*L. lactis*)

|                                                 |                                  |
|-------------------------------------------------|----------------------------------|
| Colony PCR primer for integration into genome F | GTAGATAAATTATTAGGTATACTACTGACAGC |
| Colony PCR primer for integration into genome R | CGTACCAAGCTCAGTTAATTG            |

- Sanger sequencing for spectinomycin resistance mutants (*L. lactis*)

|                                           |                          |
|-------------------------------------------|--------------------------|
| <i>L. lactis</i> RpsE sequencing primer R | ACACTTGCATCAGCTTCATC     |
| <i>L. lactis</i> RpsE sequencing primer F | ATTTTGATGTTACGTCAGCAACAC |

- Next-generation sequencing of spectinomycin resistance mutants (*L. lactis*)

|                                                    |                                                       |
|----------------------------------------------------|-------------------------------------------------------|
| Next gen. seq. primer Spectinomycin resistance F 1 | ctttccctacacgacgctcttccgatctATGGCAGAAAACAGAAGAAATG    |
| Next gen. seq. primer Spectinomycin resistance F 2 | ctttccctacacgacgctcttccgatctNATGGCAGAAAACAGAAGAAATG   |
| Next gen. seq. primer Spectinomycin resistance F 3 | ctttccctacacgacgctcttccgatctNNATGGCAGAAAACAGAAGAAATG  |
| Next gen. seq. primer Spectinomycin resistance F 4 | ctttccctacacgacgctcttccgatctNNNATGGCAGAAAACAGAAGAAATG |
| Next gen. seq. primer Spectinomycin resistance R   | ggagttcagacgtgtgctcttccgatctTTTTACCACCACCGAAGAC       |

### Nucleotide sequences of codon optimized Genes: SSAPs

- L. lactis* / *L. rhamnosus*

|                        |                                                                                                                                                                                                                                                           |
|------------------------|-----------------------------------------------------------------------------------------------------------------------------------------------------------------------------------------------------------------------------------------------------------|
| $\lambda$ -Red $\beta$ | ATGAGTACTGCACTTGCAACATTAGCTGGCAAGTTAGCAGAGCGTGT<br>TGGTATGGATTCAGTCGACCCTCAGGAGCTTATACTACCTTACGTC<br>AAACAGCGTTCAAGTGTGACGCCTCTGATGCACAATTTATCGCTTG<br>CTTATCGTAGCTAACCAGTATGGGTTGAATCCTTGGACGAAGGAGAT<br>ATACGCTTCCCGGATAAGCAGAACGGTATTGTTCCCTGTAGTAGGTG |
|------------------------|-----------------------------------------------------------------------------------------------------------------------------------------------------------------------------------------------------------------------------------------------------------|

|         |                                                                                                                                                                                                                                                                                                                                                                                                                                                                                                                                                                                                                                                                                                                                                                                                                                                                                    |
|---------|------------------------------------------------------------------------------------------------------------------------------------------------------------------------------------------------------------------------------------------------------------------------------------------------------------------------------------------------------------------------------------------------------------------------------------------------------------------------------------------------------------------------------------------------------------------------------------------------------------------------------------------------------------------------------------------------------------------------------------------------------------------------------------------------------------------------------------------------------------------------------------|
|         | TCGATGGATGGAGTAGAATTATCAATGAAAATCAACAGTTCGATGG<br>CATGGACTTCGAGCAGGATAATGAATCATGTACCTGCCGTATATATA<br>GAAAAGACCGAAATCACCCAATTTGTGTGACTGAATGGATGGATGA<br>GTGCAGACGTGAGCCGTTCAAGACCCGAGAAGGCCGTGAAATCACT<br>GGTCCGTGGCAATCACATCCAAAGAGAATGTTGCGTCACAAGGCGA<br>TGATTCAGTGCGCCCGTTTAGCTTTTGGGTTTGCTGGCATTACGACA<br>AGGACGAAGCTGAAAGAATCGTTGAAAACACTGCATATACCGCTGA<br>ACGACAACCGGAGCGTGACATTACGCCAGTGAATGACGAGACAATG<br>CAGGAAATTAACACGTTGTTGATTGCTTTGGACAAAACGTGGGACGA<br>CGACTTGTTACCACTTTGTAGCCAAATTTTCGTCGAGACATTAGAG<br>CTTCATCTGAGCTTACACAAGCTGAAGCCGTCAAGGCATTGGGGTTT<br>TTGAAACAAAAGCTACCGAACAGAAGGTAGCGGCATAA                                                                                                                                                                                                                                                                   |
| PapRecT | ATGGGAACCGCCCTTACACCTCTTTTGACAAAGTTCGCAACCAGATA<br>TGAGATGGGAACGACCCCTGAAGAGGTTGCTAATACATTGAAACAA<br>ACATGCTTCAAGGGACAGGTCAACGACAGTCAAATGGTAGCCCTTTT<br>GATAGTCGCTGACCAGTACAAGTTAAACCCGTTACCAAGGAGTTGT<br>ATGCATCCCTGACAAGAATAATGGAATCGTGCCAGTTGTTGGTGTC<br>GATGGATGGGCGAGAATAATAAACGAGAACCCTCAGTTTGATGGTA<br>TGGAATTTTCTATGGACCAGCAGGGCACTGAGTGCACGTGCAAATC<br>TATCGTAAGGATCGTTCTCACGCAATAAAGCGCTACGGAATATATGGC<br>CGAATGTAAGAGAAATACGCAACCTTGCCAAAGTCACCCACGACGT<br>ATGTTAAGACATAAAGCCATGATCCAGTGTGCGGATTAGCATTCCG<br>CTTCGCTGGTATCTACGATCAAGACGAAGCGGAACGAATAGTCGAA<br>AGAGACGTTACTCCGGCGGAGCAGTACGAAGATGTCAGCGAAGCTA<br>TATGCTTGATTAAGGACAGCCCGACGATGGAGGATTTACAGGCAGC<br>GTTACAGCAATGCCTGGAAGGCGTATAAAACCAAAGGTGCAAGAGAC<br>CAATTGACAGCCGCAAGGATCAGCGTAAAAAGGAATTAATTGATG<br>CCCCAATAGATGTCGAGTTCGAAGAACTGGCGATGATAGAGCAGC<br>ATAA                                            |
| MspRecT | ATGGCAGAAAACGCCGTGACGAAACAAGACTCACCTAAAGCCCCAG<br>AAACGATATCACAGGTCCTTCAAGTGTTAGTACCTCAATTAGCTCGA<br>GCCGTACCTAAGGGAATGGATCCTGATAGAATAGCTCGAATCGTCCA<br>GACCGAGATCAGAAAGAGTAGAAATGCGAAAGCGGCGGGAATCGC<br>CAAACAGTCATTGGATGACTGCACGCAAGAAAGCTTCGCCGGGGCG<br>TACTTACAAGTGCGGCATTGGGCCTTGAGCCAGGCGTTAACGGTGA<br>GTGTTATCTTGTTCCATACAGAGACACAAGAAGAGGTGTCGTCGAGT<br>GCCAGTTAATTATCGGGTATCAAGGAATCGTTAAATTGTTTTGGCAA<br>CATCCGCGAGCCTCTCGAATAGACGCCAGTGGGTGGGGGCAAACG<br>ATGAATTCCATTATACAATGGGTCTTAACCCAACCTTAAAACATGTA<br>AAGGCTAAGGGAGACCGAGGAAACCCAGTATATTTTTATGCTATCGT<br>AGAGGTCACGGGTGCCGAGCCTTTGTGGGATGTCTTCACAGCTGATG<br>AGATTAGAGAGTTGAGAAGAGGTAAGTTCGGTTCAAGCGGGGATAT<br>TAAGGATCCGCAGAGATGGATGGAGCGAAAGACAGCGTTAAAACAA<br>GTGCTTAAGCTTGCTCCAAAACACTCGTTTGGACGCAGCAATACG<br>AGCGGACGATAGACCGGGAACAGATTTGTCTCAAAGCCAGGCGTTG<br>GCATTACCTAGTACAGTTAAGCCAACAGCAGACTACATAGACGGTG |

|         |                                                                                                                                                                                                                                                                                                                                                                                                                                                                                                                                                                                                                                                                                                                                                                                                                                                                                                                                                                                                                                                     |
|---------|-----------------------------------------------------------------------------------------------------------------------------------------------------------------------------------------------------------------------------------------------------------------------------------------------------------------------------------------------------------------------------------------------------------------------------------------------------------------------------------------------------------------------------------------------------------------------------------------------------------------------------------------------------------------------------------------------------------------------------------------------------------------------------------------------------------------------------------------------------------------------------------------------------------------------------------------------------------------------------------------------------------------------------------------------------|
|         | AGATTGCAGAGCCACACGAGGTTGACACTCCGCCTAAAAGCAGTCG<br>AGCACAACGAGCTCAGAGAGCGACTGCCCCAGCCCCAGACGTTTCAG<br>ATGGCCAATCCGGATCAATTAAGCGTTTGGGAGAGATTCAAAAAG<br>CCGAAAAGTACAATGATGCCGACTGGTTTAAGTTCTTAGCTGATAGT<br>GCAGGGGTGAAAGCGACAAGAGCAGCTGATCTTACATTTGATGAAG<br>CAAAAGCTGTAATAGATATGTTTCGACGGCCCAAATGCTTGA                                                                                                                                                                                                                                                                                                                                                                                                                                                                                                                                                                                                                                                                                                                                               |
| LrpRecT | ATGGCTAATCAAGTAGCACAAACAGCAGAAACCGACTAAGCTAACCG<br>ATCTTGTATTAGATCGTGTTAAACAAATGCAAGACACGCAGGACTTG<br>TCACTACCCAAGAATTACAACGCTTCTAATGCGTTGAATGCAGCCTT<br>TCTCGAATTACAAAAGTACAAGACCGTAATCATCGGCCAGCCTTAG<br>AAGTATGTTCTCATGACTCGATTGTTAAGTCCTTGTTAGATATGACAC<br>TGCAAGGGCTATCCCCAGCAAAAGATCAATGCTACTTCATCGTATAC<br>GGCAATGAGCTTCAAATGCAACGGAGCTATTTTCGGTACTGTTGCAGC<br>AGTTAAGCGACTGGATGGTGTAAAGAAAGTTAGGGCAGAAGTTGTT<br>CACGAAAAGATGACTTTGAAATTGGTGCTAATGAAGACATGGAGC<br>TAGTCGTAAAGAGGTTTCGTTCCCTAAGTTTGAAAATCAAGATAATCAA<br>ATTATTGGAGCTTTTGCCATGATTAAGACTGATGAAGGTAAGTACTGACTT<br>TACTGTTATGACTAAGAAAGAGATTGATCAGTCATGGGCACAAACA<br>CGTCAAAAAATAACAAAGTACAGCAGAATTTTAGCCAAGAAATGG<br>CAAAGCGTACTGTGCTTAATCGTGCCGCTAAGATGTTTATTAACACG<br>TCTGATGATAGTGACCTTTTAACTGGTGCTATCAACGATACAACAAG<br>CAACGAATACGATGATGAGCGTCGAGATGTAACGCCCGTTGAGGAT<br>GAAAAACAAAGTACTGATAAATTGCTAGAAGGATTTCAAAGTCAC<br>AAGAAGCGAAGGCTAAGTGGGTAAAGTAATGATGGCAACAGCAACGA<br>AGGCAAAGAAACCAGTGAAGAAGTCGCAGACGGACAAACAGAACT<br>CTTCAGCGAAGGGACAATCAAACCAGCCGATGAAGCTGACAGCTAA |

- *E. coli*

|                        |                                                                                                                                                                                                                                                                                                                                                                                                                                                                                                                                                                                                                                                                                                                                                                                                                                                                              |
|------------------------|------------------------------------------------------------------------------------------------------------------------------------------------------------------------------------------------------------------------------------------------------------------------------------------------------------------------------------------------------------------------------------------------------------------------------------------------------------------------------------------------------------------------------------------------------------------------------------------------------------------------------------------------------------------------------------------------------------------------------------------------------------------------------------------------------------------------------------------------------------------------------|
| $\lambda$ -Red $\beta$ | ATGAGTACTGCACTCGCAACGCTGGCTGGGAAGCTGGCTGAACGTGT<br>CGGCATGGATTCTGTGACCCACAGGAAGTATCACCCTCTTCGCC<br>AGACGGCATTAAAGGTGATGCCAGCGATGCGCAGTTCATCGCATT<br>CTGATCGTTGCCAACCAGTACGGCCTTAATCCGTGGACGAAAGAAAT<br>TTACGCCTTTCCTGATAAGCAGAATGGCATCGTTCCGGTGGTGGGCG<br>TTGATGGCTGGTCCCGCATCATCAATGAAAACCAGCAGTTTGATGGC<br>ATGGACTTTGAGCAGGACAATGAATCCTGTACATGCCGGATTTACCG<br>CAAGGACCGTAATCATCCGATCTGCGTTACCGAATGGATGGATGAAT<br>GCCGCCGGAACCATTCAAAACCTCGCGAAGGCAGAGAAATCACGGG<br>GCCGTGGCAGTCGCATCCCAAACGGATGTTACGTCATAAAGCCATGA<br>TTCAGTGTGCCCGTCTGGCCTTCGGATTTGCTGGTATCTATGACAAGG<br>ATGAAGCCGAGCGCATTGTGCGAAAATACTGCATACTGCAGAACG<br>TCAGCCGGAACGCGACATCACTCCGGTTAACGATGAAACCATGCAG<br>GAGATTAACACTCTGCTGATCGCCCTGGATAAAACATGGGATGACGA<br>CTTATTGCCGCTCTGTTCCAGATATTTCCGCCGCGACATTCGTGCATC<br>GTCAGAAGTACACAGGCCGAAGCAGTAAAAGCTCTTGGATTCCTG<br>AAACAGAAAGCCGCGAGAGCAGAAGGTGGCAGCATGA |
|------------------------|------------------------------------------------------------------------------------------------------------------------------------------------------------------------------------------------------------------------------------------------------------------------------------------------------------------------------------------------------------------------------------------------------------------------------------------------------------------------------------------------------------------------------------------------------------------------------------------------------------------------------------------------------------------------------------------------------------------------------------------------------------------------------------------------------------------------------------------------------------------------------|

|         |                                                                                                                                                                                                                                                                                                                                                                                                                                                                                                                                                                                                                                                                                                                                                                                                                                                                                                                                                                                                                                                                                                                                                                                                                                            |
|---------|--------------------------------------------------------------------------------------------------------------------------------------------------------------------------------------------------------------------------------------------------------------------------------------------------------------------------------------------------------------------------------------------------------------------------------------------------------------------------------------------------------------------------------------------------------------------------------------------------------------------------------------------------------------------------------------------------------------------------------------------------------------------------------------------------------------------------------------------------------------------------------------------------------------------------------------------------------------------------------------------------------------------------------------------------------------------------------------------------------------------------------------------------------------------------------------------------------------------------------------------|
| PapRecT | <p>ATGGGTACTGCTCTAACGCCGTTATTAACCAAGTTTGCCACCCGCTA<br/> TGAGATGGGAACTACCCCGAAGAGGTCGCTAATACGCTGAAACAG<br/> ACTTGTTC AAGGGCCAAGTGAACGATAGTCAGATGGTAGCCCTTTT<br/> GATCGTTGCGGATCAATATAAGCTCAATCCATTACAAAAGAGCTCT<br/> ACGCGTTCCTGACAAAAATAATGGTATTGTTCCAGTTGTGGGAGTC<br/> GATGGTTGGGCTAGAATTATTAACGAGAATCCCCAGTTTGATGGGAT<br/> GGAATTCAGTATGGATCAACAGGGAACTGAATGCACTTGTA AAAATTT<br/> ACCGCAAAGACCGCTCGCACGCCATCAGCGCCACCGAGTACATGGC<br/> TGAGTGCAA AAGGAACACTCAACCTTGGCAGTCTCACCCGCGACGTA<br/> TGCTGCGTCATAAGGCTATGATTCAATGCGCCAGACTAGCCTTTGGT<br/> TTCGCGGGGATCTACGATCAGGATGAGGCCGAACGCATTGTTGAACG<br/> AGATGTA ACTCCC GCCGAGCAATACGAGGATGTATCCGAAGCGATTT<br/> GTCTGATCAAAGACTCACCAACTATGGAGGACTTGCAGGCCGCGTTC<br/> TCAAACGCGTGGAAAGCTTACAAGACTAAAGGTGCCCGTGATCAAC<br/> TGACTGCTGCTAAAGACCAGAGAAAAAAGGAGCTGTTGGATGCGCC<br/> CATTGATGTCGAATTCGAAGAACTGGAGATGATCGTGCTGCGTAA</p>                                                                                                                                                                                                                                                                                                                                                              |
| MspRecT | <p>ATGGCCGAGAATGCCGTCACGAAACAGGATTCCCCTAAGGCACCGG<br/> AAACCATTAGTCAAGTGCTTCAGGTGCTGGTCCCACAATTGGCTCGT<br/> GCAGTACCTAAAGGCATGGATCCTGATCGTATTGCACGTATCGTACA<br/> GACGGAGATTCGCAAATCCCGCAACGCAAAGCCGCTGGAATCGCA<br/> AAGCAAAGTTTAGACGATTGCACACAGGAGTCCTTTGCGGGAGCCTT<br/> ACTGACCTCAGCGGCTTTAGGGTTAGAGCCAGGCGTCAATGGGGAGT<br/> GTTATCTGGTACCCTATCGTGATACACGCCGTGGTGTGGTCGAGTGC<br/> CAACTGATTATTGGATATCAAGGGATTGTCAAACTTTTTTGGCAACA<br/> TCCGCGCGCGAGCCGCATCGATGCGCAATGGGTTGGCGCGAACGAC<br/> GAGTTCATTATACGATGGGACTTAATCCTACCTTGAAACATGTAAA<br/> GGCAAAGGTGATCGTGGAACCCGGTCTACTTTTACGCCATCGTCG<br/> AGGTGACCGGTGCTGAGCCCTTATGGGATGTTTTTACTGCTGATGAA<br/> ATTCGTGAACTTCGTCTGGCAAGGTTGGATCGTCTGGAGATATTA<br/> GGACCCCGAGCGTTGGATGGAACGCAAGACAGCATTGAAACAGGTA<br/> CTGAAATTGGCTCCCAAACACACGCCTGGATGCGGCGATCCGCGC<br/> TGATGATCGTCCAGGGACTGACCTTTCACAGTCGCAGGCTCTGGCCT<br/> TACCGTCTACCGTTAAGCCTACCGCAGACTATATTGATGGGGAGATC<br/> GCCGAACCGCATGAAGTCGATACACCACCAAAGAGTTCACGTGCTC<br/> AACCGGCACAACGTGCCACGGCACCGGCTCCTGATGTGCAAATGGC<br/> CAACCCCGACCAATTGAAGCGTCTGGGGGAGATCCAAAAGGCGGAG<br/> AAGTACAATGATGCCGACTGGTTCAAGTTTTTTGGCGGACTCCGCCGG<br/> TGTGAAAGCGACGCGTGCTGCTGATCTTACGTTTGATGAAGCAAAGG<br/> CTGTAATCGACATGTTTGATGGGCCAAACGCGTGA</p> |
| LrpRecT | <p>ATGGCGAATCAAGTTGCACAGCAACAAAAACCGACAAAATTAACCG<br/> ATCTGGTTTTGGATAGAGTCAAGCAGATGCAAGACACCCAGGACCTT<br/> AGCCTTCCGAAAACTATAACGCATCCAATGCACTGAATGCCGCGTT<br/> TTTAGAATTGCAGAAGGTACAAGACCGGAACCACAGACCAGCACTG<br/> GAAGTCTGCTCGCACGATTCTATTGTA AAAATCGCTGTTGGACATGAC<br/> TTTGCAGGGCTTATCCCCTGCGAAGGATCAGTGTTACTTCATAGTAT<br/> ATGGCAATGAGTTACAGATGCAGAGATCTTATTTCCGGGACTGTGCGG</p>                                                                                                                                                                                                                                                                                                                                                                                                                                                                                                                                                                                                                                                                                                                                                                                                                                                       |

|  |                                                                                                                                                                                                                                                                                                                                                                                                                                                                                                                                                                                                                                                                             |
|--|-----------------------------------------------------------------------------------------------------------------------------------------------------------------------------------------------------------------------------------------------------------------------------------------------------------------------------------------------------------------------------------------------------------------------------------------------------------------------------------------------------------------------------------------------------------------------------------------------------------------------------------------------------------------------------|
|  | GCAGTTAAAAGATTAGATGGGGTGAAGAAGGTCCGGGCGGAAGTCG<br>TGCATGAAAAGGACGACTTCGAAATTGGCGCCAATGAAGACATGGA<br>GCTGGTAGTGAAACGGTTTGTACCAAAGTTCGAAAATCAAGACAAC<br>CAAATAATAGGGGCGTTCGCAATGATTAACCGGATGAAGGTACGG<br>ACTTCACAGTTATGACGAAAAAGGAAATAGATCAAAGTTGGGCGCA<br>AACACGCCAGAAGAACAATAAGGTACAGCAGAACTTTAGTCAAGAA<br>ATGGCGAAACGTACAGTCCTTAATCGTGCCGCTAAGATGTTTATAAA<br>CACTTCAGACGATTCGGACTTATTAACCGGGGCCATAAATGACACGA<br>CCTCAAACGAGTATGACGATGAAAGAAGAGATGTGACACCAGTCGA<br>GGACGAAAAACAGAGCACGGATAAATTACTGGAGGGGTTTCAGAAG<br>TCGCAGGAGGCGAAAGCAAAGGGGTTAGTAACGACGGAAACAGTA<br>ATGAGGGAAAAGAGACAAGCGAGGAGGTGGCCGATGGACAGACGG<br>AACTGTTCTCTGAAGGTACTATTAACCGCAGATGAAGCGGATAGC<br>TAA |
|--|-----------------------------------------------------------------------------------------------------------------------------------------------------------------------------------------------------------------------------------------------------------------------------------------------------------------------------------------------------------------------------------------------------------------------------------------------------------------------------------------------------------------------------------------------------------------------------------------------------------------------------------------------------------------------------|

- *M. smegmatis*

|                        |                                                                                                                                                                                                                                                                                                                                                                                                                                                                                                                                                                                                                                                                                                                                                                                                                                                                                   |
|------------------------|-----------------------------------------------------------------------------------------------------------------------------------------------------------------------------------------------------------------------------------------------------------------------------------------------------------------------------------------------------------------------------------------------------------------------------------------------------------------------------------------------------------------------------------------------------------------------------------------------------------------------------------------------------------------------------------------------------------------------------------------------------------------------------------------------------------------------------------------------------------------------------------|
| $\lambda$ -Red $\beta$ | ATGAGCACGGCGCTCGCGACCTTGGCGGGGAAACTGGCAGGAGCGTG<br>TCGGCATGGATTCCGTCGACCCGCAAGA ACTCATCACCACGCTGCGC<br>CAGACGGCGTTCAAATGCGACGCCTCGGACGCCAGTTTATCGCGCT<br>CCTGATCGTCGCGAACCAGTATGGGCTGAACCCATGGACCAAGGAA<br>ATTTATGCCTTTCCCGACAAGCAGAATGGGATTGTGCCCGTCGTGGG<br>GGTGGATGGGTGGTCGCGTATCATTAAACGAAAACCAACAGTTCGAC<br>GGCATGGATTTTGAGCAGGATAACGAATCGTGTACCTGTCGGATTTA<br>CCGCAAAGACCGGAACCACCCGATTTGTGTGACGGAGTGGATGGAC<br>GAGTGCCGGCGGGAGCCATTCAAGACGCGGGAAGGGCGTGAGATTA<br>CCGGCCCCTGGCAGTCCCATCAAAGCGTATGCTCCGTCATAAGGCC<br>ATGATCCAATGTGCGCGGCTGGCCTTCGGGTTTGCGGGGATTTATGA<br>CAAGGACGAGGCGGAGCGGATTGTGGAGAACACCGCGTATACCGCC<br>GAGCGGCAGCCGGAACGCGATATTACGCCAGTCAATGACGAAACCA<br>TGCAGGAGATCAATACGCTCCTCATCGCGTTGGACAAAACGTGGGAT<br>GATGACTTGTGTCGCTCTGCTCCAGATTTTCCGCCGTGACATTCGG<br>GCCTCCTCGGAGCTGACCCAGGCGGAGGCGGTCAAAGCCTTGGGCTT<br>CCTCAAGCAGAAGGCGACCGAACAGAAGGTGGCCGCCTAA |
| LrpRecT                | ATGGCGAACCAAGTCGCGCAACAACAGAAGCCGACGAAGCTGACCG<br>ACTTGGTCTTGGACCGTGTCAAACAAATGCAGGACACGCAGGACCTC<br>AGCTTGCCGAAGAATTATAATGCCTCCAATGCCTTGAACGCCGCGTT<br>CCTGGAATTGCAAAGGTCCAAGATCGCAATCACCGTCCAGCCCTGG<br>AAGTGTGTAGCCACGACTCCATCGTCAAAGCCTCCTGGATATGACG<br>CTGCAGGGTTTGGAGCCCCGCCAAAGATCAATGCTATTTTATCGTGTA<br>CGGTAATGAGTTGCAAATGCAGCGCTCGTACTTTGGCACCGTGGCCG<br>CCGTGAAGCGCCTGGACGGCGTGAAGAAAGTCCGTGCGGAGGTCGT<br>CCATGAAAAGGACGATTTTCGAGATTGGCGCCAACGAGGACATGGAG<br>TTGGTGGTCAAGCGTTTTCGTCCAAAATTCGAGAATCAAGATAACCA<br>AATCATCGGGGCGTTTTCGATGATTAACCGGACGAGGGCACGGAT<br>TTCACGGTCATGACCAAGAAAGAGATCGACCAAAGCTGGGCCAAA<br>CGCGCCAGAAGAACAATAAGGTCCAGCAGA ACTTTAGCCAAGAGAT                                                                                                                                                                                                      |



|         |                                                                                                                                                                                                                                                                                                                                                                                                                                                                                                                                                                                                                                                                                                                                                                                                                                                                                                                                                                                                                                                                                                                                                                                                   |
|---------|---------------------------------------------------------------------------------------------------------------------------------------------------------------------------------------------------------------------------------------------------------------------------------------------------------------------------------------------------------------------------------------------------------------------------------------------------------------------------------------------------------------------------------------------------------------------------------------------------------------------------------------------------------------------------------------------------------------------------------------------------------------------------------------------------------------------------------------------------------------------------------------------------------------------------------------------------------------------------------------------------------------------------------------------------------------------------------------------------------------------------------------------------------------------------------------------------|
|         | GGCGAAGCGGACCGTGTTGAACCGTGCGGGCCAAGATGTTTATCAATA<br>CCAGCGACGACTCGGATCTCCTACCGGGGCCATCAACGACACCACC<br>TCGAACGAGTATGACGACGAGCGGCGCGATGTGACGCCAGTCGAAG<br>ATGAGAAACAGAGCACCGATAAGCTCCTGGAGGGCTTCCAGAAGTC<br>GCAAGAAGCGAAAGCGAAAGGCGTGAGCAACGATGGGAACAGCAA<br>CGAGGGTAAGGAGACGTCGGAAGAAGTGGCGGATGGTCAAACGGA<br>GCTGTTCTCGGAGGGGACCATTAAACCCGCCGACGAAGCGGACAGC                                                                                                                                                                                                                                                                                                                                                                                                                                                                                                                                                                                                                                                                                                                                                                                                                                        |
| MspRecT | ATGGCAGAAAACGCTGTAACCAAGCAAGACAGTCCCAAAGCGCCCCG<br>AGACCATATCGCAGGTATTGCAAGTGTTAGTGCCTCAATTAGCAAGA<br>GCAGTCCCCAAAGGGATGGATCCTGACAGAATAGCACGCATAGTGC<br>AGACCGAAATACGTAAGTCCCGTAATGCCAAAGCTGCCGGCATCGC<br>AAAACAATCGTTAGATGATTGTACCCAGGAGAGTTTTGCCGGGGCGC<br>TGCTTACCTCAGCAGCCTTAGGTCTGGAACCAGGAGTTAACGGAGAG<br>TGTTATTTGGTCCCATAACCGGGATACTCGTCGCGGAGTTGTTGAGTG<br>CCAACTTATTATCGGTTACCAGGGAATAGTGAAGTTGTTCTGGCAAC<br>ACCCTCGTGCGTCCCGGATTGACGCGCAGTGGGTAGGTGCAAACGAC<br>GAATTCCACTACACTATGGGCCTTAATCCGACACTTAAACACGTCAA<br>AGCGAAAGGGGATAGAGGAAACCCGGTGTACTTTTATGCAATTGTTG<br>AGGTTACTGGAGCAGAGCCGTTATGGGATGTCTTTACTGCCGATGAG<br>ATACGCGAGCTGCGTTCGTGGCAAGGTGCGGAGTTCAGGGGACATTA<br>AAGATCCCCAACGGTGGATGGAGCGGAAGACTGCGCTGAAACAGGT<br>GTTGAAGTTGGCCCCCAAACGACCCGCCTTGACGCTGCAATCCGGG<br>CGGATGATCGTCCTGGGACTGACCTGTCCCAAAGCCAAGCCTTAGCC<br>CTTCCAAGTACTGTCAAGCCAACCGCAGATTACATTGACGGGGAAAT<br>CGCAGAACCGCACGAAGTTGACACTCCTCCGAAGAGTAGCCGCGCA<br>CAACGTGCCCAGCGCGCGACGGCACCAGCGCCGGATGTGCAGATGG<br>CAAATCCTGACCAACTTAAAAGACTGGGAGAGATACAGAAAGCAGA<br>GAAGTACAACGACGCAGATTGGTTTAAAGTTTTTGGCGGACAGCGCTG<br>GCGTCAAAGCAACTCGTGCGGCCGACTTGACCTTTGACGAAGCGAA<br>GGCGGTATAGATATGTTTGTATGGTCCAAACGCCTGA |
| PapRecT | ATGGGCACCGCCCTGACCCCACTCTTGACCAAGTTTGCCACGCGGTA<br>TGAGATGGGCACCACCCAGAGGAAGTGGCGAACACCCTCAAGCAG<br>ACCTGCTTTAAGGGTCAGGTCAATGATAGCCAGATGGTGGCCTTGCT<br>GATCGTCGCGGACCAATATAAACTGAATCCATTTACCAAGGAACTCT<br>ATGCGTTTTCCGATAAGAACAATGGTATTGTCCCCGTCGTCGGCGTG<br>GACGGTTGGGCGCGGATCATTAAACGAGAACCCCAATTCGATGGCAT<br>GGAATTTTCGATGGACCAGCAAGGGACCGAATGCACCTGCAAAATC<br>TACCGGAAAGACCGTAGCCATGCCATTAGCGCCACGGAGTATATGG<br>CCGAATGTAAACGTAATACGCAGCCATGGCAATCCCATCCACGCCG<br>ATGTTGCGCCACAAGGCGATGATCCAGTGTGCGCGGTTGGCCTTTGG<br>TTTCGCGGGCATCTATGACCAGGACGAAGCGGAACGCATCGTCGAG<br>CGGGATGTGACCCCGCCGAACAGTATGAGGACGTGTCGGAGGCGA<br>TTTGTCTCATCAAAGATAGCCCAACGATGGAGGATTTGCAGGCCGCC<br>TTCAGCAACGCCTGGAAGGCGTACAAGACCAAAGGTGCCCGTGACC<br>AACTGACGGCCGCGAAGGACCAGCGTAAGAAAGAACTGTTGGATGC                                                                                                                                                                                                                                                                                                                                                                                                                   |

|  |                                                       |
|--|-------------------------------------------------------|
|  | CCCAATTGATGTCGAATTTGAGGAAACCGGGGACGATCGGGCGGGC<br>TAA |
|--|-------------------------------------------------------|

- *C. crescentus*

|                        |                                                                                                                                                                                                                                                                                                                                                                                                                                                                                                                                                                                                                                                                                                                                                                                                                                                                                    |
|------------------------|------------------------------------------------------------------------------------------------------------------------------------------------------------------------------------------------------------------------------------------------------------------------------------------------------------------------------------------------------------------------------------------------------------------------------------------------------------------------------------------------------------------------------------------------------------------------------------------------------------------------------------------------------------------------------------------------------------------------------------------------------------------------------------------------------------------------------------------------------------------------------------|
| $\lambda$ -Red $\beta$ | ATGAGCACGGCGCTCGCGACGCTCGCGGGGAAGCTGGCCGAGCGTG<br>TGGGCATGGATTTCGGTCGATCCGCAGGAGCTCATCACCACGCTCCGG<br>CAGACGGCCTTTAAGTGTGACGCGAGCGATGCCAGTTTATCGCCCT<br>CCTGATCGTGGCCAATCAGTACGGCCTGAACCCGTGGACGAAGGAA<br>ATCTACGCCTTTCCCGACAAGCAAAACGGGATCGTGCCGGTGGTTCG<br>CGTCGATGGGTGGTCCCGTATCATCAATGAAAATCAGCAATTTGATG<br>GCATGGATTTTCGAGCAAGACAATGAATCCTGCACGTGCCGCATCTAT<br>CGGAAGGACCGCAACCATCCGATCTGCGTGACGGAATGGATGGATG<br>AGTGCCCGCCGGGAGCCCTTTAAGACGCGGGAGGGCCGGGAAATCAC<br>CGGGCCCTGGCAGTCGCACCCCAAGCGGATGCTCCGTCATAAGGCG<br>ATGATCCAATGTGCCCGCCTCGCCTTCGGGTTTCGCGGGCATCTACGA<br>CAAGGATGAAGCCGAGCGCATCGTGAAAATACGGCCTACACGGCG<br>GAGCGTCAGCCGGAACGGGATATCACGCCGGTCAATGACGAAACGA<br>TGCAGGAAATCAATACCCTGCTCATCGCGCTCGACAAGACCTGGGAC<br>GATGATCTGCTGCCCTGTGTAGCAAATCTTCCGTCGTGATATCCG<br>CGCCTCGTCCGAAGTACCCAAGCGGAGGCGGTGAAGGCCCTGGGG<br>TTCCTGAAGCAGAAGGCCACCGAGCAAAAGGTTCGCGGCCTAA |
| PapRecT                | ATGGGCACGGCGCTCACGCCGCTGCTACCAAGTTTGCCACCCGTTA<br>CGAGATGGGGACCACCCCGAAGAAGTGGCGAACACCCTGAAGCAA<br>ACGTGCTTCAAGGGCCAGGTCAACGACTCGCAGATGGTGGCCCTGCT<br>CATCGTGGCCGATCAGTATAAGCTCAATCCGTTACCAAGGAAGTCT<br>ACGCGTTTCCCGATAAGAACAATGGGATCGTGCCGGTTCGTCCGGC<br>GACGGCTGGGCGCGTATCATCAATGAAAATCCGCAGTTCGACGGCA<br>TGGAATTCTCGATGGACCAACAAGGGACCGAATGTACGTGCAAGAT<br>CTATCGTAAGGATCGTTCGCACGCGATCAGCGCCACGGAATACATGG<br>CGGAGTGTAAGCGGAATACGCAGCCGTGGCAATCCCACCCCGCCG<br>TATGCTGCGCCATAAGGCGATGATCCAATGTGCCCGCCTGGCGTTG<br>GGTTCGCCGGCATCTACGATCAAGATGAAGCGGAGCGGATCGTCGA<br>ACGCGATGTGACGCCCGCCGAACAATATGAAGACGTGTGGAAGCG<br>ATCTGCCTGATCAAGGACAGCCCCACGATGGAAGATCTCCAAGCGG<br>CCTTTAGCAATGCCTGGAAGGCCTACAAGACGAAGGGGGCGCGTGA<br>CCAAGTACGGCGGCCAAGGATCAACGGAAGAAGGAGCTGCTGGAT<br>GCGCCGATCGATGTCGAATTCGAGGAAACCGGGGACGATCGTGCCG<br>CGTAA                                                |

Nucleotide sequences of codon optimized Genes: SSB

- *L. lactis* / *L. rhamnosus*

|       |                                                                                                                                                                                                                                                        |
|-------|--------------------------------------------------------------------------------------------------------------------------------------------------------------------------------------------------------------------------------------------------------|
| EcSSB | ATGGCAAGCCGTGGGGTTAACAAAGTTATTCTTGTGGAACTTAGG<br>ACAAGACCCGGAAGTGCATTATATGCCTAATGGAGGCGCGGTAGCC<br>AATATCACCTTGGCCACAAGCGAGTCTTGGCGAGACAAAGCAACAG<br>GTGAAATGAAAGAACAACACTGAATGGCACAGAGTAGTTTTGTTTGG<br>AAAATTGGCAGAGGTAGCCTCAGAATACTTGCGAAAGGGCAGTCAG |
|-------|--------------------------------------------------------------------------------------------------------------------------------------------------------------------------------------------------------------------------------------------------------|

|       |                                                                                                                                                                                                                                                                                                                                                                                                                                                                                                                                                                                                                                     |
|-------|-------------------------------------------------------------------------------------------------------------------------------------------------------------------------------------------------------------------------------------------------------------------------------------------------------------------------------------------------------------------------------------------------------------------------------------------------------------------------------------------------------------------------------------------------------------------------------------------------------------------------------------|
|       | GTCTATATAGAGGGCCAATTGCGTACCCGTAAGTGGACAGACCAGA<br>GCGGACAAGATCGTTATACGACCGAGGTCGTTGTTAATGTAGGAGG<br>CACAATGCAGATGTTGGGGGGGAGACAGGGCGGAGGCGCTCCGGCT<br>GGAGGCAATATCGGGGGTGGCCAACCTCAAGGTGGGTGGGGGCAGC<br>CACAGCAACCGCAAGGAGGTAATCAATTTAGTGGAGGAGCCCAATC<br>ACGTCCGCAGCAGTCTGCGCCTGCCGCCCTTCTAATGAACCGCCGA<br>TGGATTTTGACGATGATATACCTTTCTGA                                                                                                                                                                                                                                                                                           |
| PaSSB | ATGGCCCGTGGAGTGAACAAAGTAATTCTTGTTCGGTAATGTGGGGTG<br>GGGATCCAGAGACGCGATACATGCCAAACGGGAACGCCGTGACAAA<br>TATCACCTTAGCCACGAGCGAATCTTGGAAGGACAAACAAACAGGT<br>CAGCAACAAGAACGAACCGAATGGCATAGAGTTGTATTTTTTGGCC<br>GACTTGCTGAGATCGCGGGTGTAGTACCTTAGAAAGGGTTCTCAGGTT<br>TATGTCGAGGGCTCATTAAGAACACGTAAGTGGCAGGGGCAGGACG<br>GGCAAGACCGATATACAACCTGAAATAGTAGTGGACATAAACGGCAA<br>CATGCAACTTCTTGGTGGCAGACCGAGTGGGGACGATTACAGAGA<br>GCTCCAAGAGAACCTATGCAGCGACCACAGCAGGCTCCTCAACAGC<br>AGTCTCGTCCGGCCCCTCAGCAGCAACCGGCTCCGCAACCTGCACAA<br>GATTACGATAGTTTTGATGATGATATTCCATTCTAA                                                                       |
| MsSSB | ATGGCGGGAGACACAACAATTACGGTGTGGGAAACTTGACAGCCG<br>ATCCTGAATTGCGATTCACCCCATCAGGCGCTGCGGTGGCGAATTC<br>ACAGTCGCGAGCACCCACGAATGTTTGATAGACAATCAGGCGAAT<br>GGAAGGATGGCGAAGCGTTGTTTTTACGATGCAACATCTGGAGAGA<br>GGCGGCCGAGAACGTCGCCGAAAGCCTTACCCGTGGCAGTCGAGTG<br>ATTGTAACCGGACGATTAAAGCAAAGAAGTTTTGAGACGAGAGAAG<br>GAGAGAAACGAACCTGTGGTAGAGGTAGAGGTGGATGAAATAGGTCC<br>TAGTTTTCGTTATGCCACAGCGAAAGTAAACAAAGCCTCTCGTAGTG<br>GTGGCGGGGGGGGGCGGCTTTGGTTCAGGGGGTGGAGGTTACGACA<br>GAGCGAGCCAAAGGATGATCCTTGGGGCAGTGCCCCTGCATCAGGC<br>AGTTTTAGCGGAGCAGATGACGAGCCGCCTTTTTGA                                                                            |
| LrSSB | ATGCTTAATCGTGCAGTCTTAACTGGGCGTTTAAACAAGAGATCCCGA<br>GTTGCGGTACACAACCAGCGGGACAGCAGTTGTTTCATTTACGTTAG<br>CTGTTGATCGGCAATTCCGAAACCAAAATGGTGATCGTGATGCTGAT<br>TTTATCAATTGCGTTATTTGGCGTAAATCCGCTGAAAACCTTTAGTAA<br>CTTTACGCATAAGGGTTCACCTTGTGGGAATTGAAGGGCGTATTCAA<br>CCCGGAATTATGAAAACCAACAGGGTAACCGTGTGTATGTTACCGA<br>AGTTGTTGTAGATAATTTTGCATTGTTAGAACCTCGTCAAATGGTG<br>GCATGAACCAATCAGGGGTTCAACAACCATTTAACAGCAACCAACA<br>ATCATTGTTGCTCAGGCTCCACAATATGGTAGTCAACCACAACCTG<br>GAAATAATGCTCCTCAAAGTAATCCGTCACCAAGTATGGATAATGGT<br>TTCGATCCCAATCAAATGCTGGCAACCAGTTCCCTGGAAGCAGTGA<br>TGATGGTGGTCAATCCATTGATTTAGCTGATGACGAATTACCATTCT<br>AA |
| LISSB | ATGATTAACAATGTTGTATTAGTGGGACGCATTACTIONCGCGATCCTGA<br>ACTTCGTTACACCCCTCAAATCAAGCTGTTGCAACTTTTTTCATTGGC<br>TGAAATCGTCAATTTAAAAATGCTAACGGTGAACGTGAGGCTGATT<br>TCATTAACCTGCGTTATTTGGCGCCAACAAGCTGAAAATTTGGCAAAT                                                                                                                                                                                                                                                                                                                                                                                                                        |

|        |                                                                                                                                                                                                                                                                                                                                                                                                                                                               |
|--------|---------------------------------------------------------------------------------------------------------------------------------------------------------------------------------------------------------------------------------------------------------------------------------------------------------------------------------------------------------------------------------------------------------------------------------------------------------------|
|        | TGGGCTAAAAAAGGAGCTTTGATCGGTGTAACCTGGTTCGAATTCAAACACGTAATTATGAAAATCAACAAGGTCAACGCGTTTATGTGACTGAGGTTGTGGCTGATAGTTTCCAAATGTTGGAAAGTAGATCTGCTCGCATGGTATGGGAGGCGGAGCTTCTGCCGGTTCATATTCTGCACCAAGCCAATCTACAAATAATACTCCACGTCCACAAACGAATAATAATAGTGCAACACCGAATTTTCGGTCGTGATGCTGACCCATTTGGTAGCTCACCTATGGAAATCTCGGATGATGATCTTCCATTCTAA                                                                                                                                    |
| PapSSB | ATGCGTGGGGTTAATAAGGTAATCTTAGTTGGTAACGTGGGTGGGGACCCGGAGACCCGATATATGCCAAATGGAAACGCGGTAACAAACATCACCTTGCAACTAGTGAGAGTTGGAAAGATAAAACAACTGGCCAAACAGCAAGAACGTAAGTGGCACAGAGTGGTGTTTTTTGGCAAATTAGCCGAAATTGTCGGCCAACACGTTAAGAAAGGCCAGCAGCTTTACGTCGAAGGGTCATTGCGAACCCGTAAGTGGCAAGCGCAGGATGGTCAGGACAGATATACGACAGAAATCATAGTAGATATGCACGGACAAATGCAAATGTTTCGGGGGAAAACCTGGGAATGAGCAGGCCGCACAGTCAAGATCATCTACCCAACAACAAAGCGCCCCGCAACAACGATCAGCACAGGATGAATTTGATGATGATATACCTTTATAA |

- *E. coli*

|       |                                                                                                                                                                                                                                                                                                                                                                                                                                                                                                                                                             |
|-------|-------------------------------------------------------------------------------------------------------------------------------------------------------------------------------------------------------------------------------------------------------------------------------------------------------------------------------------------------------------------------------------------------------------------------------------------------------------------------------------------------------------------------------------------------------------|
| EcSSB | ATGGCCAGCAGAGGGCGTAAACAAGGTTATTCTCGTTGGTAATCTGGGTCAGGACCCGGAAGTACGCTACATGCCAAATGGTGGCGCAGTTGCCAACATTACGCTGGCTACTTCCGAATCCTGGCGTGATAAAGCGACCGGCGAGATGAAAGAACAGACTGAATGGCACCCGCGTTGTGCTGTTCCGCAAACCTGGCAGAAGTGGCGAGCGAATATCTGCGTAAAGGTTCTCAGGTTTATATCGAAGGTCAGCTGCGTACCCGTAATGGACCGATCAATCCGGTCAGGATCGCTACACCACAGAAGTCGTGGTGAACGTTGGCGGCACCATGCAGATGCTGGGTGGTCGTCAGGGTGGTGGCGCTCCGGCAGGTGGCAATATCGGTGGTGGTCAGCCGCAGGGCGGTTGGGGTCAGCCTCAGCAGCCGCAGGGTGGCAATCAGTTCAGCGGCGGCGCGCAGTCTCGCCCGCAGCAGTCCGCTCCGGCAGCGCCGTCTAACGAGCCGCCGATGGACTTTGATGATGACATTCCGTTCTGA |
| PaSSB | ATGGCTCGCGGGGTAAATAAGGTCATTTTGGTTGGCAATGTTGGTGGTGATCCCGAGACACGCTATATGCCTAACGGGAACGCCGTCCTAATATCACACTGGCAACGTCAGGATCATGGAAGGATAAACAGACAGGTC AACAGCAAGAACGCACGGAGTGGCACCCGCGTGGTATTTTTTCGGGCGTCTTGCTGAGATCGCCGGAGAGTATTTACGCAAAGGATCGCAGGTATACGTTGAGGGTTCTTTACGCACGCGCAAGTGGCAGGGTTCAGGATGGTCAGGACCGTTATACTACCGAAATTGTAGTCGACATTAACGGGAACATGCAATTATTAGGTGGTCGTCCGAGCGGAGATGACTCCCAGCGCGCCCCCGCGAGCCCATGCAGCGTCCGCAACAGGCTCCACAGCAGCAGAGCCGCCCTGCCCTCAACAACAACCCGCTCCTCAACCCGCGCAAGATTACGATTCGTTTGACGACGATATTCCTTTTTAA                                         |
| MsSSB | ATGGCAGGGGATAACCACGATAACCGTTGTCCGGTAACTTAACCGCGGACCTGAACCTTCGTTTCACACCATCCGGTGCAGCGGTTGCAAACCTCACGGTCGCTTCTACGCCTCGTATGTTTCGACAGACAGTCTGGTGAGTGAAAGATGGGGAAGCACTGTTTTTAAGATGCAATATATGGCGCGAA                                                                                                                                                                                                                                                                                                                                                                |

|       |                                                                                                                                                                                                                                                                                                                                                                                                                                                                                                                                                                                                                                     |
|-------|-------------------------------------------------------------------------------------------------------------------------------------------------------------------------------------------------------------------------------------------------------------------------------------------------------------------------------------------------------------------------------------------------------------------------------------------------------------------------------------------------------------------------------------------------------------------------------------------------------------------------------------|
|       | GCAGCAGAGAATGTAGCCGAGAGTTTAACCAGAGGTTACAGTGTGA<br>TCGTAACCTGGCCGTTTGAACAACGCTCCTTTGAAACACGCGAAGGC<br>GAGAAACGCACGGTAGTTGAGGTCGAAGTCGACGAGATAGGCCCGT<br>CCTTACGCTATGCCACAGCGAAAGTCAACAAAGCGTCTCGCAGCGG<br>AGGCGGTGGGGGCGGGTTTGGTAGTGGTGGGGGGGGTAGTCGTCAA<br>TCGGAACCCAAGGATGACCCGTGGGGGTCGGCACCAGCTTCAGGAA<br>GTTTTTCTGGGGCCGATGACGAGCCGCCATTTTGA                                                                                                                                                                                                                                                                                    |
| LrSSB | ATGCTGAACCGTGCCGTGCTTACTGGTCGCCTTACTCGTGACCCTGA<br>ATTGCGCTATACGACATCAGGGACTGCAGTAGTGTCTTTACATTGG<br>CGGTCGATCGTCAATTTTCGTAACCAAAACGGCGACC GCGACGCCGA<br>TTTTATCAACTGTGTGATTTGGAGAAAGAGCGCCGAGA ACTTTAGCA<br>ATTTCACTCATAAAGGGAGTTTAGTTGGAATCGAGGGGCGTATCCAA<br>ACGAGAAACTACGAAAACCAGCAAGGCAATCGCGTCTACGTAACCG<br>AAGTCGTAGTAGATAACTTCGCCCTGTTGGAACCACGGCAAAACGG<br>TGGGATGAACCAATCTGGAGTTCAACAACCCTTCAACAGTAACCAG<br>CAGTCTTTCGGGGCTCAGGCACCTCAATATGGCAGTCAGCCACAACC<br>TGAAACAATGCCCCACAGTCTAACCCAAGTCCCTCTATGGACAATG<br>GGTTTGACCCAACCAGAATGCGGGGAACCAATTCCTGGGAGCTC<br>GGATGACGGCGGCCAATCAATTGATCTGGCTGACGATGAATTACCCT<br>TTTAA |

- *M. smegmatis*

|       |                                                                                                                                                                                                                                                                                                                                                                                                                                                                                                                                                           |
|-------|-----------------------------------------------------------------------------------------------------------------------------------------------------------------------------------------------------------------------------------------------------------------------------------------------------------------------------------------------------------------------------------------------------------------------------------------------------------------------------------------------------------------------------------------------------------|
| PaSSB | ATGGCGCGTGGGGTGAACAAAGTCATCCTCGTGGGGGAATGTCGGTG<br>GCGATCCCGAAACGCGTTATATGCCGAATGGGAATGCGGTCACCAA<br>TATCACGCTCGCCACCAGCGAGTCCTGGAAAGATAAACAACGGGT<br>CAACAGCAGGAGCGTACGGAGTGGCATCGGGTGGTCTTCTTCGGGC<br>GCCTCGCCGAGATCGCCGGGGAATACCTCCGTAAAGGTTTCGAGGT<br>CTATGTGGAGGGCTCGCTGCGGACCCGTAAATGGCAAGGTCAGGAT<br>GGCCAGGATCGGTACACGACGGAAATCGTCGTGGACATTAACGGTA<br>ATATGCAATTGCTCGGTGGCCGCCCTCCGGCGATGATAGCCAGCGT<br>GCCCCGCGTGAACCGATGCAACGCCCGCAACAAGCGCCCCAACAGC<br>AATCGCGGCCCGCGCCGAGCAGCAGCCGGCCCCGCAACCAGCCCA<br>GGACTACGATTCGTTTGTATGATGACATTCCATTTTAA |
|-------|-----------------------------------------------------------------------------------------------------------------------------------------------------------------------------------------------------------------------------------------------------------------------------------------------------------------------------------------------------------------------------------------------------------------------------------------------------------------------------------------------------------------------------------------------------------|

- *C. crescentus*

|       |                                                                                                                                                                                                                                                                                                                                                                                                                                                                                                                                                        |
|-------|--------------------------------------------------------------------------------------------------------------------------------------------------------------------------------------------------------------------------------------------------------------------------------------------------------------------------------------------------------------------------------------------------------------------------------------------------------------------------------------------------------------------------------------------------------|
| PaSSB | ATGGCGCGTGGGGTCAATAAGGTGATCCTGGTCCGCAACGTGGGGG<br>GCGATCCCGAAACCCGGTACATGCCGAACGGCAACGCGGTCACCAA<br>CATCACCTGGCGACCAGCGAGAGCTGGAAGGATAAGCAAACGGGC<br>CAGCAGCAAGAACGTACGGAATGGCATCGTGTGGTCTTTTTTCGGCC<br>GGCTGGCGGAGATCGCGGGGGAATACCTCCGTAAAGGGTCCCAAGT<br>CTACGTGGAGGGCTCGCTGCGGACCCGGAAGTGGCAAGGGCAAGAT<br>GGCAAGATCGCTACACCACGGAGATCGTCGTGACATCAACGGGA<br>ACATGCAGCTCCTCGGGGGGCGTCCCTCGGGGGACGATTCCCAACG<br>CGCCCCCGTGAGCCCATGCAACGCCCGCAGCAAGCGCCCCAGCAA<br>CAATCGCGTCCCGCCCCCAGCAACAGCCGGCGCCCCAACCGGCGC<br>AGGACTACGACTCGTTCGACGATGATATCCCCTTTTAA |
|-------|--------------------------------------------------------------------------------------------------------------------------------------------------------------------------------------------------------------------------------------------------------------------------------------------------------------------------------------------------------------------------------------------------------------------------------------------------------------------------------------------------------------------------------------------------------|

Nucleotide sequences of codon optimized Genes: phage exonuclease

- *L. lactis*

|        |                                                                                                                                                                                                                                                                                                                                                                                                                                                                                                                                                                                                                                                                                                                                                                                                                                                                                                                                                                           |
|--------|---------------------------------------------------------------------------------------------------------------------------------------------------------------------------------------------------------------------------------------------------------------------------------------------------------------------------------------------------------------------------------------------------------------------------------------------------------------------------------------------------------------------------------------------------------------------------------------------------------------------------------------------------------------------------------------------------------------------------------------------------------------------------------------------------------------------------------------------------------------------------------------------------------------------------------------------------------------------------|
| PapExo | <p>ATGATAGAACAGCGTAGTGATGAATGGTTCGCGCAGCGACTTGGCC<br/> GAGTCACCGCGAGTAAAGTAAAGGATGTCATGGCGAAGGGGCGATC<br/> AGGTGCGCCATCAGCCACCAGACAGAATTACATGATGCAATTGTTAT<br/> GTGAGAGACTTACCGGGAAACGAGAAGAGGGGGTTCACGAGTGCGGC<br/> GATGCAGCGTGGGACGGACCTTGAACCAATAGCGCGATCAGCTTAT<br/> GAGTTTAAACGCAGGAGTAATGACTATAGAAACAGGCCTTATTATCC<br/> ATCCACGTATCGACGGTTTCGGAGCTAGTCCGGATGGGCTTGCGGGA<br/> GAGCATGGATTAGTGGAAATTAAGTGCCCGTCAACAGCAACGCACA<br/> TTTATACCATGCAAAGTGGTAAGCACGACCCTCAGTACGAATGGCA<br/> AATGCTTGCTCAAATGAGTTGCTCAGGCAGAGAGTGGGTGGATTTTCG<br/> TGTCATTCGACGATAGATTGCCAGACGAATTGCAATATGTTTGTTC<br/> CGTTATCACCGTGATGAAGAGAGAATAAGAGAAATGGAAAGCGAA<br/> GTTAAGGCATTCTTGGAGGAATTAGCTGAATTGGAACACCAAATGC<br/> GTGAACGTATGAGAAAGGCGGCCTAA</p>                                                                                                                                                                                                                                |
| LrpExo | <p>ATGAAACTTACGGCCAACAATTACTATAGCCATGAGACTGACTGGC<br/> AATATATGTCAGTTTCATTGTTCAAAGACTTCGAAAAGTGCGAAGCG<br/> CGTGCATTAGCAAAGTTGAAGGAAGATTGGCAACCTGTTTCTAGTCC<br/> AGTTCCGCTTTTGGTTGGGAACATGTACACAGTTATTTTCGAAAGTG<br/> CTAAGAGCCACCAAGATTTTATAGAGGCGAATAAGAAAGAGCTTAT<br/> GACCAGACCTACTAAGACAAAACCCGAACGGCCATCTTAGAGCGGAA<br/> TTTAAGGGGGCAAACCTCAATGATTCAGACCTTGCAAGCCGACGATA<br/> TGTTTAACTACTTTTATGCACCAGGGGACAAAGAAGTTATCGTTACC<br/> GGAGAGATAGACGGCTATTTGTGGAAGGGAAAAATAGACTCTTTAG<br/> TTCTTGACAAAGGCTATTTTTCGATCTTAAGACGGTAGACGACATT<br/> CATAAGGGACATTGGAATACGTATGAACACAGATACGTCCCGTTCA<br/> TTCAAGACCGAGAATATGATTTACAAATGGCTGTTTATAGAGAGTTA<br/> ATCAAGCAGACGTTTCGGGAAAAAGTGCCAACCTTTAATTTTGGCCAT<br/> CTCTAAGCAAACCTCCGCCTGACAAGATGGCCATCGACTTTAATGGCG<br/> TTGATGACGACTATCAGATGCAGGCCGATCTTGATAAGGTCAAAGA<br/> GCTTCAACCACACTTTTGGAAAGTAATGACGGGAGAGGAAGAGCCT<br/> GTCCACTGTGGTAAGTGCGACTATTGTAGAGAAACGAAAATGTTGA<br/> GCGGCTTCATCCACGCATCAGAAATAGAGGTTTAA</p> |

Negative control (no recombinase)

- All organisms

|                       |                                                                                                                                                                                                                                                                                                                                                                                                                                          |
|-----------------------|------------------------------------------------------------------------------------------------------------------------------------------------------------------------------------------------------------------------------------------------------------------------------------------------------------------------------------------------------------------------------------------------------------------------------------------|
| mCardinal<br>RBS eGFP | <p>ATGCACCATCATCACCACCACGGTTCGGCATGGTTTCTAAAGGTGA<br/> AGAAGTATGATCAAGGAAAACATGCACATGAAGCTGTATATGGAAGGT<br/> ACCGTTAACAACCACCATTTCAAATGCACCACTGAAGGTGAAGGTAA<br/> ACCGTACGAGGGTACGCAGACCCAACGTATTAAGTTGTTGAGGGT<br/> GGTCCGCTGCCGTTTCGCGTTCGACATCCTGGCGACCTGTTTCATGTAC<br/> GGCTCTAAAACCTTCATCAACCACACCCAGGGTATCCCTGACTTCTT<br/> CAAACAGTCTTTCCCGGAGGGTTTACCTGGGAACGTGTTACCACCT<br/> ACGAAGACGGTGGTGTACTGACCGTTACCCAGGACACTTCTCTGCAG</p> |
|-----------------------|------------------------------------------------------------------------------------------------------------------------------------------------------------------------------------------------------------------------------------------------------------------------------------------------------------------------------------------------------------------------------------------------------------------------------------------|

|  |                                                                                                                                                                                                                                                                                                                                                                                                                                                                                                                                                                                                                                                                                                                                                                                                                                                                                                                                                                                                                                                                                                                                                                                                                                                                                                                                           |
|--|-------------------------------------------------------------------------------------------------------------------------------------------------------------------------------------------------------------------------------------------------------------------------------------------------------------------------------------------------------------------------------------------------------------------------------------------------------------------------------------------------------------------------------------------------------------------------------------------------------------------------------------------------------------------------------------------------------------------------------------------------------------------------------------------------------------------------------------------------------------------------------------------------------------------------------------------------------------------------------------------------------------------------------------------------------------------------------------------------------------------------------------------------------------------------------------------------------------------------------------------------------------------------------------------------------------------------------------------|
|  | <p>GACGGTTGCCTGATCTACAACGTTAAACTCCGCGGTGTTAATTTCCC<br/> GTCTAACGGTCCGGTTATGCAAAAAAAGACGCTGGGTTGGGAAGCG<br/> ACTACGGAACTCTCTACCCTGCCGATGGCGGCCTCGAAGGTCGTTG<br/> TGATATGGCGCTGAAACTGGTTGGTGGCGGTACCTGCACTGCAATC<br/> TGAAAACCTACCTACCGTTCTAAAAAACAGCTAAAAACCTCAAATG<br/> CCGGGTGTTTACTTTGTTGATCGTCGTCTGGAACGTATCAAAGAAGC<br/> AGACAACGAACTTACGTTGAACAGCACGAAGTTGCGGTGGCGCGT<br/> TACTGCGACCTGCCATCTAAACTGGGTCACAAAGGTATGGACGAAC<br/> GTACAAATAAAAAAATAGGAGGAAAAACATATGGGTTCTCACCA<br/> CCATCACCACCACAGCGGCTCTAAAGGTGAAGAATTATCACTGGTG<br/> TTGTCCCAATTTGGTTGAATTAGATGGTGATGTTAATGGTCACAAAT<br/> TTTCTGTCTCCGGTGAAGGTGAAGGTGATGCTACGTACGGTAAATTG<br/> ACCTTAAAATTTATTTGTACTACTGGTAAATTGCCAGTTCCATGGCCA<br/> ACCTTAGTCACTACTTTCACTTATGGTGTTCATGTTTTTCTAGATAC<br/> CCAGATCATATGAAACAACATGACTTTTTCAAGTCTGCCATGCCAGA<br/> AGGTTATGTTCAAGAAAGAAGTATTTTTTTCAAAGATGACGGTAACT<br/> ACAAGACCAGAGCTGAAGTCAAGTTTGAAGGTGATACCTTAGTTAAT<br/> AGAATCGAATTAAGGTATTGATTTTAAAGAAGATGGTAACATTTT<br/> AGGTCACAAATTGGAATACAACATAACTCTCACAATGTTTACATCA<br/> TGGCTGACAAACAAAAGAATGGTATCAAAGTTAACTTCAAATTAG<br/> ACACAACATTGAAGATGGTCTGTTCAATTAGCTGACCATTATCAAC<br/> AAAATACTCCAATTGGTGATGGTCCAGTCTTGTTACCAGACAACCAT<br/> TACTTATCCACTCAATCTGCCTTATCCAAAGATCCAAACGAAAAGAG<br/> AGACCACATGGTCTTGTTAGAATTTGTTACTGCTGCTGGTATTACCCA<br/> TGGTATGGATGAATTGTACAAATAA</p> |
|--|-------------------------------------------------------------------------------------------------------------------------------------------------------------------------------------------------------------------------------------------------------------------------------------------------------------------------------------------------------------------------------------------------------------------------------------------------------------------------------------------------------------------------------------------------------------------------------------------------------------------------------------------------------------------------------------------------------------------------------------------------------------------------------------------------------------------------------------------------------------------------------------------------------------------------------------------------------------------------------------------------------------------------------------------------------------------------------------------------------------------------------------------------------------------------------------------------------------------------------------------------------------------------------------------------------------------------------------------|

Nucleotide sequences of codon optimized Genes: dominant negative mutL proteins

- *L. lactis*

|                              |                                                                                                                                                                                                                                                                                                                                                                                                                                                                                                                                                                                                                                                                                                                                                                                                                                                                                                                                                      |
|------------------------------|------------------------------------------------------------------------------------------------------------------------------------------------------------------------------------------------------------------------------------------------------------------------------------------------------------------------------------------------------------------------------------------------------------------------------------------------------------------------------------------------------------------------------------------------------------------------------------------------------------------------------------------------------------------------------------------------------------------------------------------------------------------------------------------------------------------------------------------------------------------------------------------------------------------------------------------------------|
| <p>E. coli MutL<br/>E32K</p> | <p>ATGCCTATACAAGTGTTGCCTCCACAGTTGGCCAACCAAATCGCG<br/> GCAGGCGAGGTGGTTCGAACGTCCGGCTTCAGTCGTTAAGGAATTG<br/> GTAAAAAATTCTTTGGATGCAGGGGCAACGAGAATTGATATTGAC<br/> ATCGAACGAGGCGGGGCAAGTTAATCAGAATCCGAGACAATGG<br/> GTGTGGGATTA AAAAGGATGAACTTGCTTTGGCGTTGGCACGTCA<br/> CGCGACCAGCAAAATAGCGTCTCTTGACGACTTGGAAGCTATTAT<br/> CAGTCTTGGTTTCCGTGGGGAAGCCTTAGCATCTATTAGCTCTGTG<br/> TCACGTTTGACTTTGACTAGCAGAACGGCGGAACAGCAGGAAGC<br/> ATGGCAAGCGTATGCGGAAGGACGAGACATGAACGTCACGGTTA<br/> AGCCGGCAGCCCACCCGGTCCGGCACGACCTTGAGAGTCTTGACT<br/> TGTTCTATAATACCCCTGCACGTCGTAAATTCTTACGAACCGAAA<br/> AGACCGAATTTAACCATATAGATGAGATAATAAGAAGAATTGCG<br/> TTAGCACGTTTCGATGTTACTATAAATTTGAGTCATAACGGAAAA<br/> ATCGTTAGACAGTATCGAGCCGTGCCTGAGGGCGGGCAGAAGGA<br/> AAGAAGATTAGGGGCTATTTGTGGCACTGCTTTTCTTGAACAAGC<br/> ACTTGCGATCGAATGGCAACATGGGGACCTTACCTTGCAGAGTTG<br/> GGTAGCGGACCCGAATCATAACAACACCAGCGTTGGCAGAGATAC<br/> AATATTGCTATGTAAACGGACGAATGATGAGAGATCGTTTGATCA</p> |
|------------------------------|------------------------------------------------------------------------------------------------------------------------------------------------------------------------------------------------------------------------------------------------------------------------------------------------------------------------------------------------------------------------------------------------------------------------------------------------------------------------------------------------------------------------------------------------------------------------------------------------------------------------------------------------------------------------------------------------------------------------------------------------------------------------------------------------------------------------------------------------------------------------------------------------------------------------------------------------------|

|                                 |                                                                                                                                                                                                                                                                                                                                                                                                                                                                                                                                                                                                                                                                                                                                                                                                                                                                                                                                                                                                                                                                                                                                                                                                                                |
|---------------------------------|--------------------------------------------------------------------------------------------------------------------------------------------------------------------------------------------------------------------------------------------------------------------------------------------------------------------------------------------------------------------------------------------------------------------------------------------------------------------------------------------------------------------------------------------------------------------------------------------------------------------------------------------------------------------------------------------------------------------------------------------------------------------------------------------------------------------------------------------------------------------------------------------------------------------------------------------------------------------------------------------------------------------------------------------------------------------------------------------------------------------------------------------------------------------------------------------------------------------------------|
|                                 | <p>ACCACGCAATACGACAGGCTTGCGAAGATAAGTTGGGGGCGGAT<br/> CAACAGCCAGCTTTCGTCTTTATCTTGAAATTGACCCTCATCAGG<br/> TAGATGTGAATGTACATCCGGCCAAACACGAGGTTTCGTTTTCATC<br/> AAAGTCGACTTGTGCATGATTTTATATAACCAGGGTGTCTTAAGTG<br/> TCTTGCAGCAGCAGCTTGAGACACCTTTACCTTTAGATGATGAGC<br/> CGCAGCCAGCTCCGCGTAGTATCCCTGAGAATCGAGTTGCCGCCG<br/> GCAGAAATCATTTCGCAGAACCGGCAGCCCGTGAACCTGTAGCAC<br/> CGAGATACACCCCGGCTCCTGCCTCTGGATCACGTCCTGCTGCC<br/> CGTGGCCTAACGCACAACCGGGCTATCAGAAGCAGCAGGGTGAA<br/> GTTTATCGTCAATTGTTACAACTCCGGCACCAATGCAAAACTT<br/> AAGGCCCGGAGCCGCAGGAACCGGCGCTTGCTGCAAATTCACA<br/> ATCTTTCGGACGAGTTTTAACAATAGTGCATAGTGACTGCGCATT<br/> ACTTGAGCGTGACGGCAACATTAGTTTGCTTTCATTGCCTGTTGCC<br/> GAGCGTTGGTTGAGACAAGCACAATTAACCCCTGGTGAAGCACC<br/> AGTCTGTGCACAGCCATTATTGATCCCATTGCGTTTTAAAGGTCTCA<br/> GCCGAGGAAAAGAGTGCTTTGGAAAAGCCCAAAGTGCCCTTGC<br/> AGAGCTTGGAATTGATTTCAAAGCGACGCACAACACGTTACGAT<br/> AAGAGCGGTTCCATTACCGTTAAGACAGCAAACTTACAAATTCT<br/> TATACCAGAGCTTATCGGGTATTTGGCGAAACAGAGCGTATTCGA<br/> ACCAGGTAATATCGCCCAGTGGATAGCGCGTAACCTTATGTCAGA<br/> ACACGCGCAGTGGAGTATGGCGCAAGCTATCACATTGTTAGCCGA<br/> CGTTGAGCGTTTGTGCCACAGTTGGTGAAAACGCCTCCGGGTGG<br/> ACTTCTTCAAAGTGTGGACTTACATCCAGCAATTAAGGCTCTTAA<br/> AGATGAATAA</p> |
| <p>L. lactis MutL<br/> E33K</p> | <p>GTGGGAAAATTATTGAACTAAATGAAGCGCTCGCCAATCAAATT<br/> GCTGCTGGAGAGGTGGTTGAGCGGCCTGCTAGTGTTGTCAAAGAA<br/> TTAGTCAAAAATCAATTGATGCTGGAAGCAGTAAAATTATTATC<br/> AATGTTGAAGAAGCAGGTTTTCGATTAATTGAAGTCATTGATAAT<br/> GGTTTGGGCTTAGAAAAAGAAGATGTGGCTTTGGCTTTGCGTCGT<br/> CATGCGACAAGTAAAATCAAAGATTCAGCTGATTTATTCGAATT<br/> AGAACGCTCGGTTTTTCGGGGTGAGGCTCTGCCGTCATCGCTTCT<br/> GTCAGTCAGATGACGATTGAAACAAGTAATGCTCAGGAAGAAGC<br/> TGGGACAAAATGATTGCTAAAGGTGGGACGATTGAAACTTTAG<br/> AACCTCTTGCAAAGCGGTTAGGGACAAAATTTCTGTTGCGAATC<br/> TTTTTTATAATACACCAGCAAGGCTCAAGTATATCAAGTCTTTACA<br/> GGCTGAACTTTCTCATATTACAGATATTATCAATCGTTTGAGCCTC<br/> GCTCATCCAGAGATTTCTTTTACTTTAGTTAATGAGGGTAAAGAA<br/> TTTTTGAAAACGGCGGGAAATGGGAGACTTGCGCCAAGTGATTGCT<br/> GCAATTTATGGCATTGGAACGGCGAAAAAAATGCGTGAGATTAA<br/> TGGCTCGGACTTAGATTTTGAAGTACAGGTTATGTCAGTTTACCC<br/> GAGCTGACAAGAGCGAATCGCAACTATATCACGATTTTATTAAAT<br/> GGTCGATTTATCAAGAATTTTTTGTGAAATCGAGCAATTTTAGAA<br/> GGTTACGGGAACCGATTGATGGTTGGACGTTTTCTTTTGTGTTT<br/> TATCAATTAATAATTGACCCTAAATTAGCAGATGTCAATGTCCATC<br/> CGACAAAACAAGAAGTACGTTTGTCTAAGGAACGTGAATTGATG<br/> ACTTTAATTTCTAAAGCGATTGATGAGACCTTATCAGAAGGGGTT</p>                                                                  |



|                                                                                                                                                                                |                                                                                                                                                                                                                                                                                                                                                                                                                                                                                                                                                                                                                                                                                                                                                                                                                                                                                                                                                                                                                                                                                                                                                                                                                                                                 |
|--------------------------------------------------------------------------------------------------------------------------------------------------------------------------------|-----------------------------------------------------------------------------------------------------------------------------------------------------------------------------------------------------------------------------------------------------------------------------------------------------------------------------------------------------------------------------------------------------------------------------------------------------------------------------------------------------------------------------------------------------------------------------------------------------------------------------------------------------------------------------------------------------------------------------------------------------------------------------------------------------------------------------------------------------------------------------------------------------------------------------------------------------------------------------------------------------------------------------------------------------------------------------------------------------------------------------------------------------------------------------------------------------------------------------------------------------------------|
|                                                                                                                                                                                | <p>TTGATTCCAGAAGCTTTGGAAAATTTGCAAGGTAGAGCCAAGGAA<br/> AAGGGGACTGTTTCTGTTCAAACGGAACCTCCTTTACAGAATAAT<br/> CCTTTATACTATGACAATGTTTCGTCAAGATTTTTTTGTCAGAGAAG<br/> AAGCGATTTTTGAAATCAATAAAAACGATAATTCAGATTCTCTGA<br/> CTGAACAAAATTCTACTGATTATACAGTTAATCAGCCAGAACTG<br/> GTTCTGTCAGTGAAAAAATTACGGACAGAACTGTCGAAAGTTCAA<br/> ATGAATTTACTGACAGAACCCCAAAAATTTCTGTCAGTAACTTTG<br/> GAGTTGATTTTGATAATATTGAGAAGCTGAGTCAGCAATCAACTT<br/> TTCCCAACTAGAATACTTGGCACAATTGCATGCGACTTATTTACT<br/> TTGTCAGTCAAAGAGGGTCTTTATTTGGTTGACCAACATGCGGC<br/> TCAGGAGCGAATCAAGTATGAATATTGGAAAGATAAAATCGGCG<br/> AAGTGAGCATGGAGCAACAAATTTACTTGCGCCATATTTATTTA<br/> CTTTACCAAAAATGATTTTATTGTTTTAGCTGAGAAAAAGGATT<br/> ATTACATGAAGCAGGGGTTTTCTTGGAGAATACGGAGAAAATC<br/> AATTCATATTAAGAGAGCATCCGATTTGGTTAAAAGAACTGAGA<br/> TAGAGAAATCAATTAATGAAATGATTGATATTATTCTCTCATCAA<br/> AAGAATTTTCACTCAAAAATATCGGCATGATTTAGCCGCAATGG<br/> TTGCTTGTAAGCTCAATCAAAGCCAACCATCCCCTTGATGCCG<br/> AGTCTGCTAGAGCTTTGCTTAGAGAATTATCAACTTGTA AAAATC<br/> CTTATAGTTGTGCGCATGGACGGCCAACGATTGTCCATTTTTTCAG<br/> GAGATGACATTCAAAAATGTTCCGCAGAATTCAAGAAACGCAT<br/> CGTTCAAAGCGGCCTCTTGGAAAGATTTTGAGTAA</p>                                                                                                                |
| <p><i>L. lactis</i><br/> dsDNA<br/> template<br/> (Erythromycin<br/> resistance<br/> gene)<br/> Homology<br/> arm, promoter,<br/> gene,<br/> terminator,<br/> homology arm</p> | <p>ATGATTGAACTTAGTGGCAAAGATAGAAAGTATTTGTATAAACTA<br/> GTAAAATCCAAAAAATAAATTATGAACAAGGTAATTTATCGCAT<br/> CAAGTTTTAATTGAAAACAAGTTAGCAAAAAGTTACTTTACAAGC<br/> GATAAATATGATCCTGACTTAGGGGAACACATAAATCCACAAAAT<br/> ATTATTGCTCCAAGTACAGGTTAAGATATAAAAATATTTAT<br/> CGTGAACAATTATGGGAAAAATATTTTACTCCTATTTGGGTATCT<br/> ACGGCAACAACGACTCTAATATGGTTAGCAAAAATATTTACTAGAG<br/> AACTTGCTGTAACGCTAAGTAAGTACTATCCATAGCTCTTTTTT<br/> ATCTTTTCTCATCTTTCCACCTCCTAGCCCACTCGGGCTTTTTAAT<br/> TAAAATTGTTAATCTCATGAAACGCCATGCCTATTTCTAACAGT<br/> AAGATAATGCTGTCAGTATAGCGCCTAAGCGTTTCTTTTTGTTCTG<br/> ATTTTTAATGTGGTCTTTATTCTTCAACTAAAGCACCATTAGTT<br/> CAACAAACGAAAATTGGATAAAGTGGGATATTTTTAAAATATATA<br/> TTTATGTTACAGTAATATTGACTTTTAAAAAAGGATTGATTCTAAT<br/> GAAGAAAGCAGACAAGTAAGCCTCCTAAATTCCTTTAGATAAA<br/> AATTTAGGAGGCATATCAAATGAACAAAATATAAAAATATTCTCA<br/> AACTTTTTAACGAGTGAAAAAGTACTCAACCAAATAATAAAAC<br/> AATTGAATTTAAAAGAAACCGATACCGTTTACGAAATTGGAACAG<br/> GTAAAGGGCATTAAACGACGAACTGGCTAAAATAAGTAAACAG<br/> GTAACGTCTATTGAATTAGACAGTCATCTATTCAACTTATCGTCAG<br/> AAAAATAAAACGTAATACTCGTGTCACTTTAATTCACCAAGATA<br/> TTCTACAGTTTCAATCCCTAACAAACAGAGGTATAAAAATTGTTG<br/> GGAGTATTCCTTACCATTTAAGCACACAAATTATTA AAAAAGTGG<br/> TTTTGAAAGCCATGCGTCTGACATCTATCTGATTGTTGAAGAAG</p> |

GATTCTACAAGCGTACCTTGGATATTCACCGAACACTAGGGTTGC  
TCTTGCACACTCAAGTCTCGATTCAGCAATTGCTTAAGCTGCCAG  
CGGAATGCTTTCATCCTAAACCAAAGTAAACAGTGTCTTAATAA  
AACTTACCCGCCATACCACAGATGTTCCAGATAAATATTGGAAGC  
TATATACGTACTTTGTTTTCAAATGGGTCAATCGAGAATATCGTC  
AACTGTTTACTAAAAATCAGTTTCATCAAGCAATGAAACACGCCA  
AAGTAAACAATTTAAGTACCGTTACTTATGAGCAAGTATTGTCTA  
TTTTAATAGTTATCTATTATTTAACGGGAGGAAATAATAATATG  
AGATAATGCCGACTGTACTTTTTACAGTCGGTTTTCTAATGTCACT  
AACCTGCCCGTTAGTTGAAGAAGGTTTTTATATTACAGCTCCAC  
GGTTAAATTTGTCGCCTGACTGTTTAAAGCTCGTTAGACTACGAT  
ATTTCCGCTTGTCGTAAGTTGTACAAGTAAATCAAGAATGATTTT  
GTGATAGTACGGTTTAGACTGCCTGCTTTGCATGATTGCGGTGTCT  
AGTTTGTTTCATGGTTAGTTATCCTTAACTTGCAAAAAAATCAAGTT  
AATAGTTAAAATTTTTCATCAAGTCATAAATAGAATTTTCTTCTAA  
ATTTGCTGCTCTTTCTAATTCTTTAACCTTATCAAGTGTTAATTTAT  
TCGGAGCTAATCTAATGCGATATAGAGCATTATATGTGATTCCCA  
TATTCTTCGCTATCGCCTCATATCTTACCCCTGATTGTTTTAAAAT  
CTCATCAAGTGGTTTATAAGTTTTACTCATTTTATCTCCTTTCTGAT  
TTTTATGTTTTTCATTCTAACATTAAGTTTATGCAAGTAAT  
AACTTTACTTTTTTGCAAGTTTTCTCTTGAAAGTAGTT

## Plasmids:

LOCUS pARC8 3497 bp DNA circular UNA 15-NOV-2018  
DEFINITION whole plasmid sequencing.  
ACCESSION urn.local...3f-8p8b27t  
VERSION urn.local...3f-8p8b27t  
KEYWORDS .  
SOURCE E. coli  
ORGANISM E. coli.

FEATURES Location/Qualifiers  
promoter 4..133  
/standard\_name="pBAD promoter"  
misc\_feature 115  
/standard\_name="pBAD TSS"  
CDS 140^141  
/standard\_name="Insert genes here"  
rep\_origin 186..1098  
promoter 1262..1459  
/standard\_name="promoter"  
gene 1460..2320  
/gene="bla; Ampicillin"  
/locus\_tag="N840\_4489"  
/standard\_name="Beta Lactamase"  
gene complement(2453..3298)  
/standard\_name="araC protein"  
mRNA complement(3299..3453)  
/standard\_name="beginning of araC mRNA"  
regulatory 3328..133  
/standard\_name="pBAD-araC regulatory region"

## ORIGIN

```
1 tccacattga atatattgcac agcgtcacac tttgcaaagc attagcattt ttgtccataa
61 gattagcgga tcttgcctga cggtttttgc cgcgactctc tataatcttcc ccatacctgt
121 ttttctggat ggagtaagac ctagtgggga agcttatcga tgataagctg tcaaacaatga
181 gaattacaac ttatatcgta tggggctgac ttcagggtgct acatttgaag agataaattg
241 cactgaaatc tagaaatatt ttatctgatt aataagatga tcttcttgag atcgttttgg
301 tctgcgcgta atctcttgct ctgaaaacga aaaaaccgcc ttgcagggcg gtttttcgaa
361 ggttctctga gctaccaact ctttgaaccg aggtactggt cttggaggag cgcagtcacc
421 aaaacttgtc ctttcagttt agccttaacc ggcgcatgac ttcaagacta actcctctaa
481 atcaattacc agtggctgct gccagtggtg cttttgcatg tctttccggg ttggactcaa
541 gacgatagtt accggataag ggcgagcggg cggactgaac ggggggttcg tgcatacagt
601 ccagcttggg gcgaactgcc taccgggaac tgagtgtcag gcgtggaatg agacaaacgc
661 ggccataaca gcggaatgac accggtaaac cgaaaggcag gaacaggaga gcgcacgagg
721 gagccgccag ggggaaacgc ctggtatctt tatagtctctg tcgggttttcg ccaccactga
781 tttgagcgtc agatttctgt atgcttgtca ggggggcgga gcctatggaa aaacggcttt
841 gccgcgccc tctcacttcc ctggttaagta tcttcttggc atcttccagg aaatctccgc
901 cccgttcgta agccatttcc gctcgcgcga gtcgaacgac cgagcgtagc gagtcagtga
961 gcgaggaagc ggaatatatc ctgtatcaca tattctgctg acgcaccggg gcagcctttt
1021 ttctcctgcc acatgaagca cttcactgac accctcatca gtgccaacat agtaagccag
1081 tatacactcc gctagcgtg atgtccggcg gtgcttttgc cgttacgcac caccctgtca
1141 gtagctgaac aggagggaca gctgatagaa acagaagcca ctggagcacc tcaaaaacac
1201 catcatacac taaatcagta agttggcagc atcaccgcag gcacttttgc ccgaataaat
1261 acctgtgacg gaagatcact tcgcagaata aataaatcct ggtgtccctg ttgataccgg
1321 gaagccctgg gccaaactttt ggcgaaaatg agacgttgat cggcacgtaa gaggttccaa
1381 ctttcaccat aatgaaataa gatcactacc gggcgtattt tttgagttat cgagattttc
1441 aggagctaag gaagctaaaa tgagtattca acatttccgt gtcgccctta ttccctttt
```

```

1501 tgcggcattt tgccttctctg tttttgctca cccagaaacg ctggtgaaag taaaagatgc
1561 tgaagatcag ttgggtgcac gagggtggtta catcgaactg gatctcaaca gcggtgaagat
1621 ccttgagagt tttcgccccg aagaacggtt tccaatgatg agcactttta aagttctgct
1681 atgtggcgcg gtattatccc gtattgacgc cgggcaagag caactcggtc gccgcataca
1741 ctattctcag aatgacttgg ttgagtactc accagtcaca gaaaagcatc ttacggatgg
1801 catgacagta agagaattat gcagtgctgc cataaccatg agtgataaca ctgcggccaa
1861 cttacttctg acaacgatcg gaggaccgaa ggagctaacc gcttttttgc acaacatggg
1921 ggatcatgta actcgccttg atcgttggga accggagctg aatgaagcca taccaaacga
1981 cgagcgtgac accacgatgc ctgtagcaat ggcaacaacg ttgcgcaaac tattaactgg
2041 cgaactactt actctagctt cccggcaaca attaatagac tggatggagg cggataaagt
2101 tgcaggacca cttctgcgct cggcccttcc ggctggctgg tttattgctg ataaatctgg
2161 agccgggtgag cgtggttctc gcggtatcat tgcagcactg gggccagatg gtaagccctc
2221 ccgtatcgta gttatctaca cgacggagag tcaggcaact atggatgaac gaaatagaca
2281 gatcgctgag ataggtgcct cactgattaa gcattggtaa tttttttaag gcagttattg
2341 gtgcccttaa acgcctgggt gctacgcctg aataagtgat aataagcggg tgaatggcag
2401 aaattcgaat agttacggct tatgacatct ttgtggacac atcattcact ttttattcac
2461 atccggccct gaactcgcta ggacttgcct cgggtgcattt tttaaatacc cgcgaaaaat
2521 agagctgatc gtcaaatacca acattgcgct caacgttcgc tatcggcatt cgcgtagtgc
2581 taagcagaag tttcgcttgg ctgatacgtc gatcttcgct ccagctcaat acgctaattg
2641 ctaactgctg gcggaacaga tgtgataacc gggagggcga caggcagaca tgctgggcga
2701 cgctggcgat atcaaaatgg ctgtccgcca gatggctcgt gatatactgg caggcatcgc
2761 gcacacggct atccatcggc ggggtgcaac actcattaat taccgccata cgtctgagca
2821 acaactgctc cagcagattg atcgccagta gctcagaata gcgaccttcc ccttgcccgg
2881 cgctgatgat ctgcccgaac agttcgctga aatgcggctg gcgcgcctcg tccgggcgga
2941 aaaatcctgt ctgggcaaag attgtcggcc aggtcagcca ctctgccag taggcgagag
3001 gccggaaata aaccacttgg tgataccact cgctggcgtc cggatgccgt ccatagtgat
3061 gaatctcgcc cggcgggaaac aataatatac cgccaggccg acagacaaac tgctcgccat
3121 tattattaat gacgcctctc ccgcggttgg tcagggttaag aatataatccc ttcattgccc
3181 acggacgata gataaaaaaa tccagatata cattcgttcc gatcggcgtc agcccggcga
3241 ccagatgggc attaaatgaa tatcccggca atagcggatc attttgcggt tcagccatga
3301 tttctctacc ccccgatggt cagagaagaa acaaatgtc catatcgacc aggacgacag
3361 agcttccgtc tccgcaagac tttgcgcttg atgaaagcac gtatcaacc cgcttgtgaa
3421 aagcgctttg taacaaaagc gtacagttca ggcgataaaa ttaagtaaca gaagtgtcta
3481 taactatggc tggaatg

```

//

LOCUS pJP005 3330 bp DNA circular 14-NOV-2018

DEFINITION .

ACCESSION urn:local...a0u-9pzs0ys

VERSION urn:local...a0u-9pzs0ys

KEYWORDS .

SOURCE null

ORGANISM .

FEATURES Location/Qualifiers

```

    promoter    1..195
                /note="P-nisin"
    here        203^204
                /note="insert genes"
                /label="insert genes misc"
    gene        2586..3233
                /note="Cm"

```

ORIGIN

```

1 agatctagtc ttataactat actgacaata gaaacattaa caaatctaaa acagtcttaa
61 ttctatcttg agaaagtatt ggtaataata ttattgtcga taacgcgagc ataataaacg
121 gctctgatta aattctgaag tttgttagat acaatgattt cgttcgaagg aactacaaaa
181 taaattataa ggaggcactc accggtagca ctagttctag agagctcaag ctttctttga

```

241 accaaaatta gaaaaccaag gcttgaaacg ttcaattgaa atggcaatta aacaaattac  
301 agcacgtggt gctttgattg atagccaaaa agcagcagtt gataaagcaa ttactgatat  
361 tgctgaaaaa ttgtaattta taaataaaaa tcacctttta gaggtgggtt ttttatttat  
421 aaattattcg tttgatttcg ctttcgatag aacaatcaaa gcgagaataa ggaagataaa  
481 tcccataagg gcgggagcag aatgtccgag actaatgtaa atttgtccac caattaaagg  
541 accgataacg cgagcttctc gagtgcatat tttcggcaat cttctcaatg agatgctctt  
601 cagcatgttc aatgatgtcg attttttatt aaaacgtctc aaaatcgttt ctgagacggt  
661 ttagcgttta tttcgtttag ttatcggcat aatcgttaaa acaggcggtta tcgtagcgta  
721 aaagcccttg agcgtagcgt gctttgcagc gaagatggtg tctgttagat tatgaaagcc  
781 gatgactgaa tgaaataata agcgcagcgt ccttctattt cggttggagg aggctcaagg  
841 gagtttgagg gaatgaaatt ccctcatggg tttgatttta aaaattgctt gcaattttgc  
901 cgagcggtag cgctggaaaa tttttgaaaa aaatttgtaa tttggaaaaa aatgggggga  
961 aaggaagcga attttgcttc cgtactacga cccccatta agtgccgagt gccaattttt  
1021 gtgccaaaaa cgctctatcc caactggctc aaggggttga ggggtttttc aatcgccaac  
1081 gaatcgccaa cgttttcgcc aacgtttttt ataaatctat atttaagtag ctttattggt  
1141 gtttttatga ttacaaagtg atacactaat tttataaaat tttttgattg gagtttttta  
1201 aatggtgatt tcagaatcga aaaaaagagt tatgatttct ctgacaaaag agcaagataa  
1261 aaaattaaca gatatggcga aacaaaaagg tttttcaaaa tctgcgggtg cggcgttagc  
1321 tatagaagaa tatgcaagaa aggaatcaga acaaaaaaaaa taagcgaaag ctcgctttt  
1381 tagaaggata cgagttttcg ctacttgttt ttgataaggt aatataatcat ggctattaaa  
1441 aatactaaag ctagaaatth tggattttta ttatatcctg actcaattcc taatgattgg  
1501 aaagaaaaat tagagagttt gggcgtatct atggctgtca gtcctttaca cgatatggac  
1561 gaaaaaaaaag ataaagatac atggaatagt agtgatgta tacgaaatgg aaagcactat  
1621 aaaaaaccac actatcacgt tatatatatt gcacgaaatc ctgtaacaat agaaagcgtt  
1681 aggaacaaga ttaagcgaaa attggggaat agttcagttg ctcattgttga gatacttgat  
1741 tatatcaaag gttcatatga atatttgact catgaatcaa aggacgctat tgctaagaat  
1801 aaacatatat acgacaaaaa agatattttg aacattaatg attttgatat tgaccgctat  
1861 ataacacttg atgaaagcca aaaaagagaa ttgaagaatt tacttttaga tatagtggat  
1921 gactataatt tggtaaatac aaaagattta atggctttta ttcgccttag gggagcggag  
1981 tttggaatth taaatacgaa tgatgtaaaa gatattgtht caacaaactc tagcgccttt  
2041 agattatggt ttgagggcaa ttatcagtgt ggatatagag caagttatgc aaagttcctt  
2101 gatgctgaaa cgggggaaat aaaatgacaa acaagaaaaa agagttatth gctgaaaatg  
2161 aggaattaaa aaaagaaatt aaggacttaa aagagcgtat tgaaagatac agagaaatgg  
2221 aagttgaatt aagtacaaca atagatttat tgagaggagg gattattgaa taaataaaag  
2281 cccccctgac gaaagtcgac ggcaatagtt acccttatta tcaagataag aaagaaaagg  
2341 atttttcgct acgctcaaat cctttaaaaa aacacaaaag accacattth ttaatgtggg  
2401 ctttattctt caactaaagc acccattagt tcaacaaacg aaaattggat aaagtgggat  
2461 atttttaaaa tatatattta tgttacagta atattgactt ttaaaaaagg attgattcta  
2521 atgaagaaag cagacaagta agcctcctaa attcacttta gataaaaatt taggaggcat  
2581 atcaaatgaa ctttaataaa attgatttag acaattggaa gagaaaagag atatttaatc  
2641 attatttgaa ccaacaaacg acttttagta taaccacaga aattgatatt agtgttttat  
2701 accgaaacat aaaacaagaa ggatataaat tttaccctgc atttattttc ttagtgacaa  
2761 ggggtgataaa ctcaaataca gcttttagaa ctggttacaa tagcgacgga gagttaggtt  
2821 attgggataa gtttagagcca ctttatacaa tttttgatgg tgtatctaaa acattctctg  
2881 gtatttggac tcctgtaaag aatgacttca aagagtttta tgatttatac ctttctgatg  
2941 tagagaaata taatggttcg gggaaattgt ttcccaaac acctatacct gaaaatgctt  
3001 tttctctttc tattattcct tggacttcat ttactgggtt taacttaaat atcaataata  
3061 atagtaatta ctttctaccc attattacag caggaaaatt cattaataaa ggtaattcaa  
3121 tatatttacc gctatcttta caggtacatc atctgtttg atttctgttt tgatgggtat  
3181 tgtttatgaa ctctattcag gaattgtcag ataggcctaa tgactggctt ttataatatg  
3241 agataatgcc gactgtactt tttacagtcg gttttcta at gtcactaacc tgccccgtta  
3301 gttgaagaag gtttttatat tacagctcca

//

LOCUS pKM444 6044 bp ds-DNA circular 02-NOV-2020

DEFINITION .

ACCESSION urn.local...f-9qz9eu2

VERSION urn.local...f-9qz9eu2

KEYWORDS .

SOURCE .

ORGANISM .

COMMENT COMMENT ApEinfo:methylated:1.

FEATURES Location/Qualifiers

misc\_feature 23..42 /standard\_name="rrnB2"  
misc\_feature 72..377 /standard\_name="Ptet promoter"  
misc\_feature 272..288 /standard\_name="tetO"  
misc\_feature 377^378 /created\_by="gabrielFilsinger"  
/label="insert genes here"  
misc\_feature 384..471 /standard\_name="terminator"  
misc\_feature 599..1414 /standard\_name="Kan"  
misc\_feature 1536..4010 /standard\_name="oriM"  
misc\_feature 4323..4340 /standard\_name="rrnBT2"  
misc\_feature 4362..4499 /standard\_name="ptb21(int) "  
misc\_feature 4529..5151 /standard\_name="tetR"  
misc\_feature 5271..5803 /standard\_name="oriE"

ORIGIN

1 actagttgat tagctaagca gaaggccatc ctgacggatg gcctttttgc gtttaatact  
61 gtttaaactc tagaaatatt ggatcgctcg caccgtcacg gccgtgggag gcggcacgat  
121 ccgcgacgtg atgatcggcc gcacccccac ggtgctgcgc agtgagctct acgccatccc  
181 ggcggttgatc tgtgctgctc cacgcacagg cccgggtgga gaaggggtctc tgacgagcgg  
241 gagaactccc tatcagtgat agagtttgct ctccctatca gtgatagata ggctctggga  
301 gtaccctgtg gtacgaccag cacggcatac atcatttcga cgccgagaga ttcgcccgcc  
361 gaaatgagca cgatccggtt aactagcgtc cgatcgactg ccaggcatca aataaaacga  
421 aaggctcagt cgaaagactg ggcctttcgt tttatgcat catggccgcg ggacgtcggg  
481 ggggggggaa agccacgttg tgtctcaaaa tctctgatgt tacattgcac aagataaaaa  
541 tatatcatca tgaacaataa aactgtctgc ttacataaac agtaatacaa ggggtggtat  
601 gagccatatt caacgggaaa cgtcttgctc gaggccgaga ttaaattcca acatggatgc  
661 tgattttatat ggggtataaat gggctcgcga taatgtcggg caatcagggtg cgacaatcta  
721 tcgcttgat ggggaagcccc atgcgccaga gttgtttctg aaacatggca aaggtagcgt  
781 tgccaatgat gttacagatg agatggtcag actaaactgg ctgacggaat ttatgcctct  
841 tccgaccatc aagcatttta tccgactcc tgatgatgca tggttactca ccactgcat  
901 cccgggaaa acagcattcc aggtattaga agaatacct gattcagggtg aaaatattgt  
961 tgatgcgctg gcagtgttcc tgcgccggtt gcattcgatt cctgtttgta attgtccttt  
1021 taacagcgat cgcgtatttc gtctcgctca ggcgcaatca cgaatgaata acggtttggt  
1081 tgatgcgagt gattttgatg acgagcgtaa tggctggcct gttgaacaag tctggaaaga  
1141 aatgcataat cttttgccat tctcaccgga ttcagtcgtc actcatggtg atttctcact  
1201 tgataacctt atttttgacg aggggaaatt aatagggttg attgatgttg gacgagtcgg  
1261 aatcgcagac cgataccagg atcttgccat cctatggaac tgcctcgggtg agttttctcc  
1321 ttcattacag aaacggcttt ttcaaaaata tggattgat aatcctgata tgaataaatt

1381 gcagtttcat ttgatgctcg atgagttttt ctaatcagat atcaagcttt agctaattaa  
1441 ttgggggaccc tagaggtccc cttttttatt ttatcgatac cgtcgacctc gaggggggggc  
1501 ccgccgggga tcatcgagcc gagaacgtta tcgaagttgg tcatgtgtaa tcccctcggt  
1561 tgaactttgg attaagcgta gatacacctt tggacaagcc agttggattc ggagacaagc  
1621 aaattcagcc ttaaaaaggg cgaggcctgc ggtggtggaa caccgcaggg cctctaaccg  
1681 ctcgacgcgc tgcaccaacc agcccgcgaa cggctggcag ccagcgtaag gcgcggtca  
1741 tcgggcgggc ttcgccacga tgtcctgcac ttcgagccaa gcctcgaaca cctgctgggtg  
1801 tgcacgactc acccggttgt tgacaccgcg cgcgcccggt cggtctcggt ggggcggtg  
1861 tgtcgcctt gccagcgtga gtagecgtga cctcacctcg cccaacaggt cgcacacagc  
1921 cgattcgtac gccataaagc caggtgagcc caccagctcc gtaagttcgg gcgctgtgtg  
1981 gctcgtaccc gcgcattcag gcggcagggg gtctaacggg tctaaggcgg cgtgtacggc  
2041 cgccacagcg gctctcagcg gcccggaacc gtccctgaaa cgacgcatgt gttcctcctg  
2101 gttggtacag gtggttgggg gtgctcggct gtcgctgggt tccaccacc agggctcgac  
2161 gggagagcgg gggagtggtc agttgtgggg tggcccctca gcgaaatata tgacttgag  
2221 ctctgtcgg accatacacc ggtgattaat cgtggtctac taccaagcgt gagccacgtc  
2281 gccgacgaat ttgagcagct ctggctgcg tactggccgc tggcaagcga cgatctgctc  
2341 gaggggatct accgccaag ccgcgctcg gccctaggcc gccggtacat cgaggcgaac  
2401 ccaacagcgc tggcaaacct gctggtcgtg gacgtagacc atccagacgc agcgtccga  
2461 gcgctcagcg cccgggggtc ccatccgctg cccaacgcga tcgtgggcaa tcgcccac  
2521 ggccacgcac acgcagtgtg ggcactcaac gccctgttc cacgcaccga atacgcgagg  
2581 cgtaagccgc tcgcatacat ggcggcgtgc gccgaaggcc ttcggcgcgc cgtcgacggc  
2641 gaccgcagtt actcaggcct catgacaaa aaccccggcc acatcgctg ggaacggaa  
2701 tggctccact cagatctcta cacactcagc cacatcgagg ccgagctcgg cgcgaacatg  
2761 ccaccgccc gcctggcgtca gcagaccacg taaaagcgg ctcgacgcc gctagggcgg  
2821 aattgcgcac tgttcgattc cgtcaggttg tgggectatc gtcccgcct catgcggtac  
2881 tacctgccga cccggaacgt ggacggactc ggccgcgcga tctatgccga gtgccacgcg  
2941 cgaaacgccg aattcccgtg caacgacgtg tgtcccggac cgtaccgga cagcgaggtc  
3001 cgcgccatcg ccaacagcat ttggcgttgg atcacaacca agtcgcgatc ttgggaggac  
3061 gggatcgtgg tctacgagge cacactcagt gcgcgccagt cggccatctc gcggaagggc  
3121 gcagcagcgc gcacggcggc gagcacagt gcgcggcgcg caaagtcgc gtcccatg  
3181 gaggatctgc tatgagcgc ggctacagcg accgctacag cgacggctac aaccgcagc  
3241 cgactgtccg caaaaagcgg cgcgtgaccg ccgcccgaagg cgctcgaatc accggactat  
3301 ccgaacgcca cgtcgtccgg ctctgtggcg aggaacgcag cgagtggctc gccgagcagg  
3361 ctgcacgcgc cgaacgcate cgcgcctatc acgacgacga gggccactct tggccgaaa  
3421 cggccaaaca tttcgggctg catctggaca ccgttaagcg actcggctat cgggcgagga  
3481 aagagcgtgc ggcagaacag gaagcggctc aaaaggccca caacgaagcc gacaatccac  
3541 cgctgttcta acgcaattgg ggagcgggtg tcgcccgggt tccgtggggg gttccggtgc  
3601 aacgggtcgg acaggtaaaa gtccctggtag acgctagttt tctggtttgg gccatgcctg  
3661 tctcgtttcg tgtttcgttg cgcctgttt gaataccagc cagacgagac ggggttctac  
3721 gaatcttggc cgataccaag ccatttccgc tgaatatcgg ggagctcacc gccagaatcg  
3781 gtggtttgtg tgatgtacgt ggcgaactcc gttgtagtgc ctgtggtggc atccgtggcc  
3841 actctcgttg cacggttcgt tgtgccgta caggccccgt tgacagctca ccgaacgtag  
3901 ttaaaacatg ctggtcaaac taggtttacc aacgatacga gtcagctcat ctagggccag  
3961 ttctaggcgt tgttcgttgc gcggttcgtt gcgcatgttt cgtgtggttg ctataggtc  
4021 ccgcaaccac acgcttcgag gttgagtgt tccagcagcg gcgcatcca gaagaacttc  
4081 gtcgtgcgac tgtcctcgtt gatccttgcc gagctgggat ggaagctcgg ccgaccacc  
4141 tggaggagat gatcgaggat gccagggcct ttcacgccc cgctgctga gcgtccgccc  
4201 ccggcccgc accgcccgtc gccggcccgc tccgggctcg cagcagcggg cttcggcgcg  
4261 gggcccgggc tcccagcgc gggcggggct cccggcggcc gcgtattagg taagcagaag  
4321 gccatcctga cggatggcct ttttgcgtt aatactgcat gcactctaga aatattggat  
4381 cgtcgcaccg ggttaagcct ggagtgcggt ggtgcctggt cggcattttc gcagtcgagg  
4441 gctctcgtgt agcctgggcg agttgcccgc gcaggcgacc ctctgccac ggatccgcat  
4501 ggtaccatca ggaggaatca cttcgcaatg tctagattag ataaaagtaa agtgattaac  
4561 agcgcattag agctgcttaa tgaggctcga atcgaagggt taacaaccgc taaactcgc  
4621 cagaagcttg gtgtagagca gcctacattg tattggcatg taaaaataa gcgggcccctg  
4681 ctcgacgcct tagccattga gatgttagat aggcaccata ctacttttg cccttagaa  
4741 ggggaaagct ggcaagattt tttacgtaat aacgctaaaa gtttttagat tgctttacta

```

4801 agtcatcgcg atggagcaaa agtacattta ggtacacggc ctacagaaaa acagtatgaa
4861 actctcga aaa atcaattagc ctttttatgc caacaagggt tttcactaga gaacgcgta
4921 tatgcactca gcgctgtggg gcattttacc ttaggttgcg tattggaaga tcaagagcat
4981 caagtcgcta aagaagaaag ggaaacacct actactgata gtatgccgcc attattacga
5041 caagctatcg aattatattga tcaccaaggt gcagagccag ctttcttatt cggccttgaa
5101 ttgatcagat gcggattaga aaaacaactt aaatgtgaaa gtgggtctta atgaccatgg
5161 gctagattta aatcactgag cgtcagacct cgtagaaaag atcaaaggat cttcttgaga
5221 tccttttttt ctgcgcgtaa tctgctgctt gcaaacaaaa aaaccaccgc taccagcggg
5281 ggtttgtttg ccggatcaag agctaccaac tctttttccg aaggtaactg gcttcagcag
5341 agcgcagata ccaaatactg tccttctagt gtagccgtag ttaggccacc acttcaagaa
5401 ctctgtagca ccgcctacat acctcgctct gctaactctg ttaccagtgg ctgctgccag
5461 tggcgataag tcgtgtctta ccgggttgga ctcaagacga tagttaccgg ataaggcgca
5521 gcggtcgggc tgaacggggg gttcgtgcac acagcccagc ttggagcgaa cgacctacac
5581 cgaactgaga tacctacagc gtgagctatg agaaagcgc acgcttcccg aaggagagaa
5641 ggcggacagg tatccggtaa gcggcagggt cggaacagga gagcgcacga gggagcttcc
5701 agggggaaac gcctggtatc tttatagtcc tgtcgggttt cgccacctct gacttgagcg
5761 tcgatttttg tgatgctcgt cagggggcg gagcctatgg aaaaacgcca gcaacgcggc
5821 ctttttacgg ttcttgccct tttgctggcc ttttgctcac atgttctttc ctgcttatc
5881 ccctgattct gtggataacc gtattaccgc ctttgagtga gctgataccg ctgcgccgag
5941 ccgaacgacc gagcgcagcg agtcagtgag cgaggaagcg gaagagcgcc caatacgcaa
6001 accgcctctc cccgcgcggt ggccgattca ttaatgcagc taga

```

//

LOCUS pBXMCS-2 5344 bp DNA circular UNA 14-NOV-2018

DEFINITION pBXMCS-2.

ACCESSION urn:local...alq-9pzuoa8

VERSION urn:local...alq-9pzuoa8

KEYWORDS .

SOURCE unknown

ORGANISM unknown.

FEATURES Location/Qualifiers

```

misc_feature 458..1252
              /note="no references defined"
              /standard_name="kanamycin resistance determinant"
misc_feature 1600..1659
              /note="no references defined"
              /standard_name="rrnB T1T2"
misc_feature 1660..2019
              /note="no references defined"
              /standard_name="Pxyl fragment"
here         2019^2020
              /note="insert genes"
              /standard_name="insert genes misc"
misc_feature 2890..3552
              /note="no references defined"
              /standard_name="rep"
misc_feature 4546..200

```

ORIGIN

```

1 accttcggga ggcgctgaag cccgttctgg acgccctggg gccgttgaat cgggatatgc
61 aggccaaggc cgccgcgac atcaaggccg tgggcgaaaa gctgctgacg gaacagcggg
121 aagtccagcg ccagaaacag gccagcgcgc agcaggaacg cgggcgcgca catttccccg
181 aaaagtgcc cctgggatga atgtcagcta ctgggctatc tggacaaggg aaaacgcaag
241 cgcaaagaga aagcaggtag cttgcagtgg gcttacatgg cgatagctag actgggcggg
301 tttatggaca gcaagcgaac cggaattgcc agctggggcg ccctctggta aggttgggaa
361 gccctgcaaa gtaaaactgga tggctttctt gccccaagg atctgatggc gcaggggatc

```



421 aagatctgat caagagacag gatgaggatc gtttcgcatg attgaacaag atggattgca  
481 cgcaggttct ccggccgctt ggggtggagag gctattcggc tatgactggg cacaacagac  
541 aatcggctgc tctgatgccg ccgtgttccg gctgtcagcg caggggccc cggttctttt  
601 tgtcaagacc gacctgtccg gtgccctgaa tgaactgcag gacgaggcag cgcggctatc  
661 gtggctggcc acgacgggcg ttccttgccg agctgtgctc gacgttgtca ctgaagcggg  
721 aagggactgg ctgctattgg gcgaagtgcc ggggcaggat ctccctgtcat ctcaccttgc  
781 tcctgccgag aaagtatcca tcatggctga tgcaatgcgg cggtgcata cgcttgatcc  
841 ggctacctgc ccattcgacc accaagcgaa acatcgcacg gagcgagcac gtactcggat  
901 ggaagccggt cttgtcgatc aggatgatct ggacgaagag catcaggggc tcgcgccagc  
961 cgaactgttc gccaggctca aggcgcgcat gcccgcggc gaggatctcg tcgtgaccca  
1021 tggcgatgcc tgcttgccga atatcatggt ggaaaatggc cgcttttctg gattcatcga  
1081 ctgtggccgg ctgggtgtgg cggaccgcta tcaggacata gcgttggtca cccgtgatat  
1141 tgctgaagag cttggcggcg aatgggctga ccgcttctc gtgctttacg gtatcggcgc  
1201 tcccgattcg cagcgcacg ccttctatcg ccttcttgac gagttcttct gagcgggact  
1261 ctgggggttcg aaatgaccga ccaagcgacg cccaacctgc catcacgaga tttcgattcc  
1321 accgccgctt tctatgaaag gttgggcttc ggaatcgttt tccgggacgc cggctggatg  
1381 atcctccagc gcggggatct catgctggag ttcttcgccc acccccatgg gcaaatatta  
1441 tacgcaaggc gacaagggtgc tgatgccgct ggcgattcag gttcatcatg ccgtttgtga  
1501 tggcttccat gtcggcagaa tgcttaatga attacaacag tttttatata agctttcagt  
1561 cggcgcgaat gctccacgcc gcgccacgcg gcgaggatcc aaataaaacg aaaggctcag  
1621 tcgaaagact gggcctttcg ttttatctgt tgtttgcgc tgcagccagc cgtggtcggg  
1681 cagcaggtag aaggcgcctt cgtcctgatc ctccgccgaa acctccagcc cccggtcgat  
1741 ggcttcgacg acatagccgg ccgcgcggca ggtgtcgggt agcgcggcca gcagggcggc  
1801 ttcttggtca ggggtcagggt cggatcatggg caagagggtcc aggtcgtggt ttgtcggcgg  
1861 cttctagcat ggaccgcccg cgcctgtgag gccgaggatt tcgcgctggt cagacaacct  
1921 acttgccgtc cccacatggt agcgcatacca agtgccgacg aacgcgcgcc gccgacgggtg  
1981 tcggcgcttc agacgctcga gttttgggga gacgaccata tgaaaacggg cccccctcg  
2041 aggtcgacgg tategataag cttgatatcg aattcctgca gcccggggga tccactagtt  
2101 ctagagcggc cgcaccgcg gtggagctcc aattcgcctt atagtgagtc gtattacgct  
2161 cgctcactgg ccgtcgtttt acaacgtcgt gactgggaaa acctggcgt taccacactt  
2221 aatcgccttg cagcacatcc cctttcgcg agctggcgta atagcgaaga ggcccgcacc  
2281 gatcgccctt cccaacagtt gcgcagcctg aatggcgaat ggaaattgta agcgttaata  
2341 ttttgttaaa attcgcgtta aatttttggt aaatcagctc attttttaac caataggccg  
2401 tactgcgatg agtggcaggg cggggcgtaa tttttttaag gcagttattg gtgcccttaa  
2461 acgcctggtg ctacgcctga ataagtgata ataagcggat gaatggcaga aattcgaaag  
2521 caaattcgac ccggctcgtc gttcagggca gggctcgttaa atagccgctt atgtctattg  
2581 ctggtttacc ggtttattga ctaccggaag cagtgtgacc gtgtgcttct caaatgcctg  
2641 aggccagttt gctcaggctc tccccgtgga ggtaataatt gacgatatga tcatttatc  
2701 tgcctcccag agcctgataa aaacggtgaa tccgttagcg aggtgccgcc ggcttccatt  
2761 caggtcgagg tggcccggct ccatgcaccg cgacgcaacg cggggaggca gacaaggat  
2821 agggcggcga ggcggctaca gccgatagtc tggaacagcg cacttacggg ttgctgcgca  
2881 acccaagtgc taccggcgcg gcagcgtgac ccgtgtcggc ggctccaacg gctcgcctc  
2941 gtccagaaaa cacggctcat cgggcatcgg caggcgtgc tgcccgcgcc gttcccattc  
3001 ctccgtttcg gtcaaggctg gcaggctctg ttccatgcc ggaatgcggg gctggctggg  
3061 cggctcctcg ccggggccgg tcggtagtgt ctgctcgcgc ggatacaggg tcgggatgcg  
3121 gcgcaggctc ccatgcccc aacgcgattc gtctcgtcgc tcgtgatcaa ccaccagggc  
3181 ggcactgaac accgacaggg gcaactggct gcggggctgg ccccacgcca cgcggtcatt  
3241 gaccactag gccgacacgg tgccggggcc gttgagcttc acgacggaga tccagcctc  
3301 gggccaccaag tccttgactg cgtattggac cgtccgcaaa gaacgtccga tgcattgga  
3361 aagtgtcttc tggctgacca ccacggcgtt ctggtggccc atctgcgcca cgaggtgatg  
3421 cagcagcatt gccgcctggt gtttctcgc aataagccc gcccacgctt catgccttt  
3481 gcgttccggt tgcaccaggt gaccgggctt gttcttggct tgaatgccga tttctctgga  
3541 ctgctggtcc atgcttatct ccatgctgta ggggtgccga cggttgcggc accatgcgca  
3601 atcagctgca acttttcggc agcgcgacaa caattatgcg ttgcgtaaaa gtggcagtca  
3661 attacagatt ttctttaacc tacgcaatga gctattgcgg ggggtgccgc aatgagctgt  
3721 tgcgtacccc ctttttttaa gttgttgatt ttaagtctt tcgcatttcg ccctatatct  
3781 agttctttgg tgcccaaaga agggcacccc tgccggggtc ccccacgctt tcggcgcggc

```

3841 tccccctccg gcaaaaagtg gcccctccgg ggcttggtga tcgactgcgc ggccttcggc
3901 cttgcccaag gtggcgctgc ccccttgga cccccgact cgccgccgtg aggctcgggg
3961 ggcaggcggg cgggcttcgc cttcgactgc cccactcgc ataggcttgg gtcgttccag
4021 gcgcgtcaag gccaaagccg tgcgcggctg ctgcgcgagc cttgaccgcg cttccacttg
4081 gtgtccaacc ggcaagcgaa gcgcgcaggc cgcaggccgg aggcttttcc ccagagaaaa
4141 ttaaaaaaat tgatggggca aggccgcagg ccgcgcagtt ggagccgggt ggtatgtggt
4201 cgaaggctgg gtagccgggt ggcaatccct gtgggtcaagc tcgtgggcag gcgcagcctg
4261 tccatcagct tgtccagcag ggttgctcac gggccgagcg aagcgagcca gccggtggcc
4321 gctcgcggcc atcgtccaca tatccacggg ctggcaaggg agcgcagcga ccgcgcaggg
4381 cgaagccccg agagcaagcc cgtagggcgc cgcagccgcc gtaggcggtc acgactttgc
4441 gaagcaaagt ctagtgagta tactcaagca ttgagtggcc cgccggaggc accgccttgc
4501 gctgcccccg tcgagccggt tggacaccaa aagggagggg caggcatggc gccatacgcg
4561 atcatgcat gcaagaagct ggcgaaaatg ggcaacgtgg cggccagtct caagcacgcc
4621 taccgcgagc gcgagacgcc caacgctgac gccagcagga cgccagagaa cagcactgg
4681 gcggccagca gcaccgatga agcagtgggc cgactgcgcg agttgctgcc agagaagcgg
4741 cgcaaggacg ctgtgttggc ggtcgagtac gtcagcagc ccagcccgga atggtggaag
4801 tcggccagcc aagaacagca ggcggcgttc ttcgagaagg cgcacaagtg gctggcggac
4861 aagtacgggg cggatcgcat cgtgacggcc agcatccacc gtgacgaaac cagcccgcac
4921 atgaccgcgt tcgtggtgcc gctgacgcag gacggcaggg tgtcggccaa ggagttcatc
4981 ggcaacaaag cgcagatgac ccgcgaccag accacgtttg cggccgctgt ggccgatcta
5041 gggctgcaac ggggcatcga gggcagcaag gcacgtcaca cgcgcattca ggcgttctac
5101 gaggccctgg agcggccacc agtgggccac gtcaccatca gcccgcaagc ggtcgagcca
5161 cgcgcctatg caccgcaggg attggccgaa aagctgggaa tctcaaagcg cgttgagacg
5221 ccggaagccg tggccgaccg gctgacaaaa gcggttcggc aggggtatga gcctgcccta
5281 caggccgccc caggagcgcg tgagatgcgc aagaaggccg atcaagccca agagacggcc
5341 cgag

```

//

```

LOCUS      pAD1                      3775 bp ds-DNA      circular SYN 02-NOV-
2020
DEFINITION synthetic linear DNA.
ACCESSION
VERSION    .
KEYWORDS   .
SOURCE     synthetic DNA construct
  ORGANISM synthetic DNA construct.
REFERENCE  1 (bases 1 to 4507)
AUTHORS    .
TITLE      Direct Submission
JOURNAL    Exported Sunday, Jun 16, 2019 from SnapGene 4.3.7
           https://www.snapgene.com
FEATURES   Location/Qualifiers
   source   1..3775
            /organism="synthetic DNA construct"
            /mol_type="other DNA"
   misc_feature complement(34..660)
            /note="tetR (from pKD154)"
   misc_feature complement(667..678)
            /note="RBS"
   misc_feature complement(683..736)
            /note="Rud3a Promoter"
   misc_feature 737..1023
            /note="slpA promoter"
            /modified_by="gabrielfilsinger"
            /label="Synthetic TetO promoter"
   misc_feature 1023^1024

```

```

        /created_by="gabrielFilsinger"
        /label="Insert genes here"
misc_feature 1098..1141
        /note="rrnB_T1_terminator"
        /label="rrnB_T1_terminator"
misc_feature complement(1167..1186)
        /note="Sanger Primer (reverse)"
misc_feature complement(1202..1900)
        /note="RepA"
misc_feature complement(1967..2128)
        /note="ORFC"
misc_feature complement(2129..2168)
        /note="P1 promoter"
misc_feature complement(2169..2378)
        /note="ORFB"
misc_feature 2331..2379
        /note="Inverted Repeat III (sso)"
misc_feature 2463..2485
        /note="Inverted Repeat II (sso)"
misc_feature 2532..2663
        /note="Inverted Repeat I (sso)"
misc_feature 2716..2829
        /note="terminator t0"
misc_feature complement(2835..3569)
        /note="ermC"
misc_feature 3731..3750
        /note="Sanger Primer (forward)"

```

ORIGIN

```

1 aattcgcggc cgcttctaga ggaaatcata aaattaagac ccactttcac atttaagttg
61 tttttcta atcgcatatga tcaattcaag gccgaataag aaggctggct ctgacacctg
121 gtgatcaaat aattcgatag cttgtcgtaa taatggcggc atactatcag tagtaggtgt
181 ttccctttct tcttttagcga cttgatgctc ttgatcttcc aatacgcaac ctaaagtaaa
241 atgccccaca gcgctgagtg catataatgc attctctagt gaaaaacctt gttggcataa
301 aaaggcta attgattttcga gagtttcata ctgtttttct gtaggcctgt tacctaaatg
361 tacttttgct ccatcgcgat gacttagtaa agcacatcta aaacttttag cgttattacg
421 taaaaaatct tgccagcttt ccccttctaa agggcaaaaag tgagtatggg gcctatctaa
481 catctcaatg gctaaggcgt cgagcaaagc ccgcttattt tttacatgcc aatacaatgt
541 aggctgctct acacctagct tctgggcgag tttacggggt gttaaacctt cgattccgac
601 ctcatthaagc agctcta atg cgctgtta at cactttactt ttatcta atc tagacatcat
661 ctagtatttc tcctctttct ctcgcaacta ttaaagttta tcatcatcag aacaagctgt
721 caacatcttt ttataatgct tgtgggggta agcggtaggt gaaatattac aaatagtatt
781 tttcggtc at ttttaacttg c tatttcttga agaggttagt acaatatgaa tcgtggccct
841 atcagtgata gagatcaggc gccctatcag tgatagagat gattcttcag caagactact
901 acctcatgag agttatagac tcatggatct tgctttgaag ggttttgta c attataggct
961 cctatcacat gctgaacct a tggcctatta cattttttta tttttcaagg aggaaaagac
1021 cactactagt agcggccgct gcaggcctca gggcccgatc gatgccgccc cttaatat
1081 taatccagag gcatcaaata aaacgaaagg ctcagtcgaa agactgggccc tttcgtttta
1141 tctgttgttt gtcgggtgaa c gctctcctga gtaggacaaa tccgcccgcc tagacctagt
1201 gtcattttat ttccccggtt tcagatcaa gaacctttgc ataacttgc ctatattccac
1261 actgataatt gccctcaaac cataatctaa aggcgctaga gtttggtgaa acaatatctt
1321 ttacatcatt cgtattttaa attccaaact ccgctcccct aaggcgaata aaagccatta
1381 aatcttttgt atttacaaa ttatagtc at cactatatac taagagtaaa ttcttcaatt
1441 ctcttttttg gctttcatca agtggtatat agcgggtca at atcaaatca ttaatgttca
1501 aatatctttt tttgtcgtat atatgtttat tcttagca at agcgtccttt gattcatgag
1561 tcaaatatc at atgaacct ttgatata at caagtatctc aacatgagca actgaactat
1621 tccccaat ttcgctta atc ttgttcctaa cgctttctat tgttacagga tttcgtgcaa
1681 tatatataac gtgatagtg t ggttttttat agtgctttcc atttcgtata acatcactac

```

1741 tattccatgt atctttatct tttttttcgt ccatatcgtg taaaggactg acagccatag  
1801 atacgcccaa actctcctaat ttttccttcc aatcattagg aattgagtca ggatataata  
1861 aaaatccaaa atttctagct ttagtatttt taatagccat gatataatta ccttatcaaa  
1921 aacaagtagc gaaaactcgt atccttctaa aaacgcgagc tttcgcttat tttttttggt  
1981 ctgattcctt tcttgcatat tcttctatag ctaacgccgc aaccgcagat tttgaaaaac  
2041 ctttttgttt cgccatatct gtttaattttt tatcttgctc ttttgctcaga gaaatcataa  
2101 ctcttttttt cgattctgaa atcaccattt aaaaaactcc aatcaaataa ttttataaag  
2161 ttagtgatc actttgtaat cataaaaaaca acaataaagc tacttaataa tagatttata  
2221 aaaaacgttg gcgaaaacgt tggcgattcg ttggcgattg aaaaaccctt taaacccttg  
2281 agccagttgg gatagagcgt ttttggcaca aaaattggca ctcggcactt aatgggggggt  
2341 cgtagtacgg aagcaaaaatt cgcttctttt cccccattt ttttccaaat tccaaatttt  
2401 tttcaaaaaa tttccagcgc taccgctcgg caaaattgca agcaattttt aaaaatcaaac  
2461 ccatgagggga atttcattcc ctcatactcc tttgagcctc ctccaaccga aatagaaggg  
2521 cgctgcgctt attatttcat tcagtcacgc gctttcataa tctaacagac aacatcttcg  
2581 ctgcaaagcc acgctacgct caagggcttt tacgctacga taacgcctgt tttaacgatt  
2641 atgccgataa ctaaacgaaa taaacgctaa aacgtctcag aaacgatttt gagacgtttt  
2701 aataaaaaat cgcttagtgc ttggattctc accaataaaa aacgcccggc ggcaaccgag  
2761 cgttctgaac aaatccagat ggagtcttga ggtcattact ggatctatca acaggagtcc  
2821 aagcgagctc ggtattactt attaaataat ttatagctat tgaaaagaga taagaattgt  
2881 tcaaagctaa tattgtttta atcgtcaatt cctgcatggt ttaaggaatt gttaaattga  
2941 ttttttgtaa atattttctt gtattctttg ttaaccctt tcataacgaa ataattatac  
3001 ttttgtttat ctttggtgga tattcttgat tttttctac ttaatctgat aagtgagcta  
3061 ttcacttttag gtttaggatg aaaatattct cttggaacca tacttaatat agaaatatca  
3121 acttctgcca ttaaaagtaa tgccaatgag cgttttgtat ttaataatct tttagcaaac  
3181 cegtattcca cgattaaata aatctcatta gctatactat caaaaacaat tttgctgatt  
3241 atatccgtac ttatgttata aggtatatta ccatatattt tataggattg gtttttagga  
3301 aattttaaact gcaatatatc cttgtttaaa acttggaat tatcgtgatc aacaagttta  
3361 ttttctgtag ttttgcataa tttatggtct atttcaatgg cagttacgaa attacacctc  
3421 tttactaatt caagggtaaa atggcctttt cctgagccga tttcaaagat attatcatgt  
3481 tcatttaatc ttatatttgt cattatttta tctatattat gttttgaagt aataaagttt  
3541 tgactgtggt ttatattttt ctcgttcatt tattatttcc ttctctttt ctacagtatt  
3601 taaagatacc ccaagaagct aattataaca agacgaactc caattcactg ttccttgcat  
3661 tctaaaacct taaatacaga aaacagcctt ttcaaagttg ttttcaaagt tggcgataa  
3721 catagtatcg acggagccga ttttgaaacc acaattatga tagaatttga cgctcg

//

## Additional Supplementary Figures

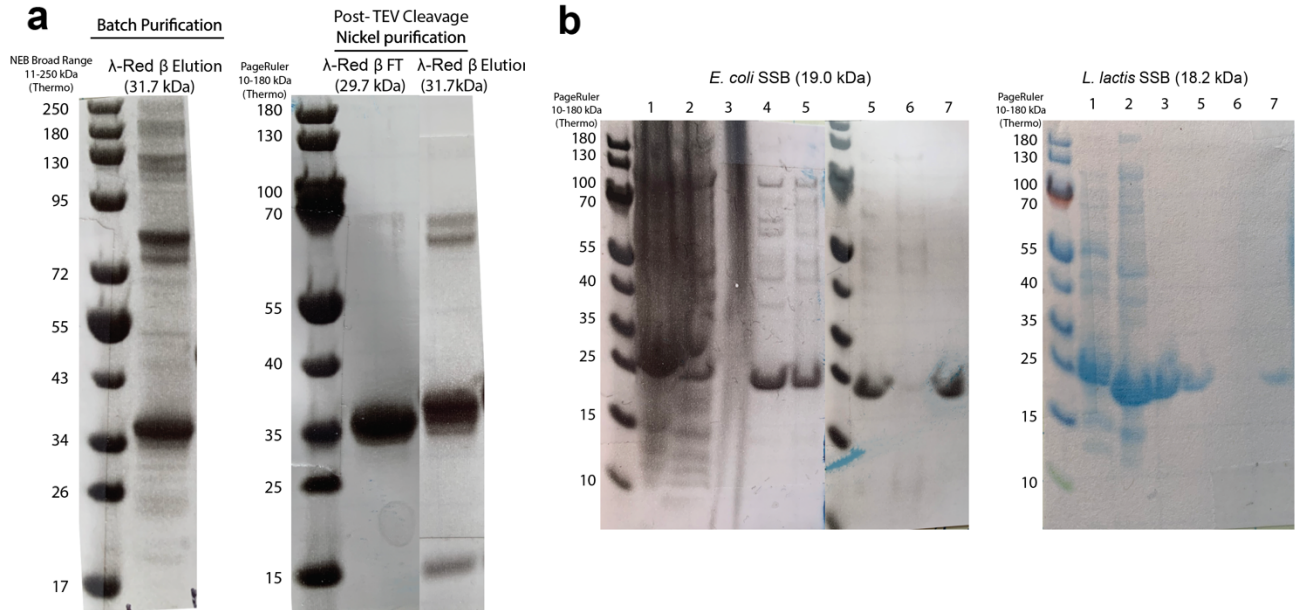

### Supplementary Figure 1.

Bis-Tris SDS-PAGE denaturing gels during purification of  $\lambda$ -Red  $\beta$ , EcSSB, and LISSB as described in “Methods”. In (b), the lanes are as follows: 1. Lysed cell culture, 2. Fraction I (pellet after clarification), 3. Polymyxin P precipitation supernatant, 4. Resuspended Polymyxin P pellet, 5. Fraction II (Polymyxin P supernatant), 6. Supernatant after ammonium sulfate precipitation, 7. Fraction III (Final resuspension of ammonium sulfate pellet after clarification). This experiment was performed once to generate the presented gel images.

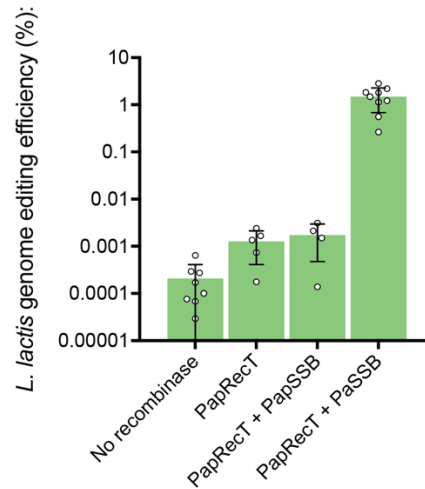

### Supplementary Figure 2.

A number of phage operons containing a SSAP also include a phage SSB protein, as is the case for the *P. aeruginosa* phage. However, co-expression of this phage SSB protein (PapSSB) along with the phage SSAP (PapRecT) did not allow recovery of editing activity in *L. lactis*, unlike co-expression of a paired bacterial SSB (PaSSB). Error bars indicate SD from the mean of at least four biologically independent replicates.

One note is that the PapSSB C7 amino acids “FDDDIPL” do not match the C7 amino acids of the bacterial SSBs that PapRecT is compatible with (“FDDDIPF”). The terminal lysine (L) in the PapSSB is a single nucleotide mutation away from the phenylalanine-(F)-containing cognate C7 tail, so we speculate that this gene may be mutated since the phage SSB is carried in a likely non-essential prophage operon within *P. aeruginosa*.

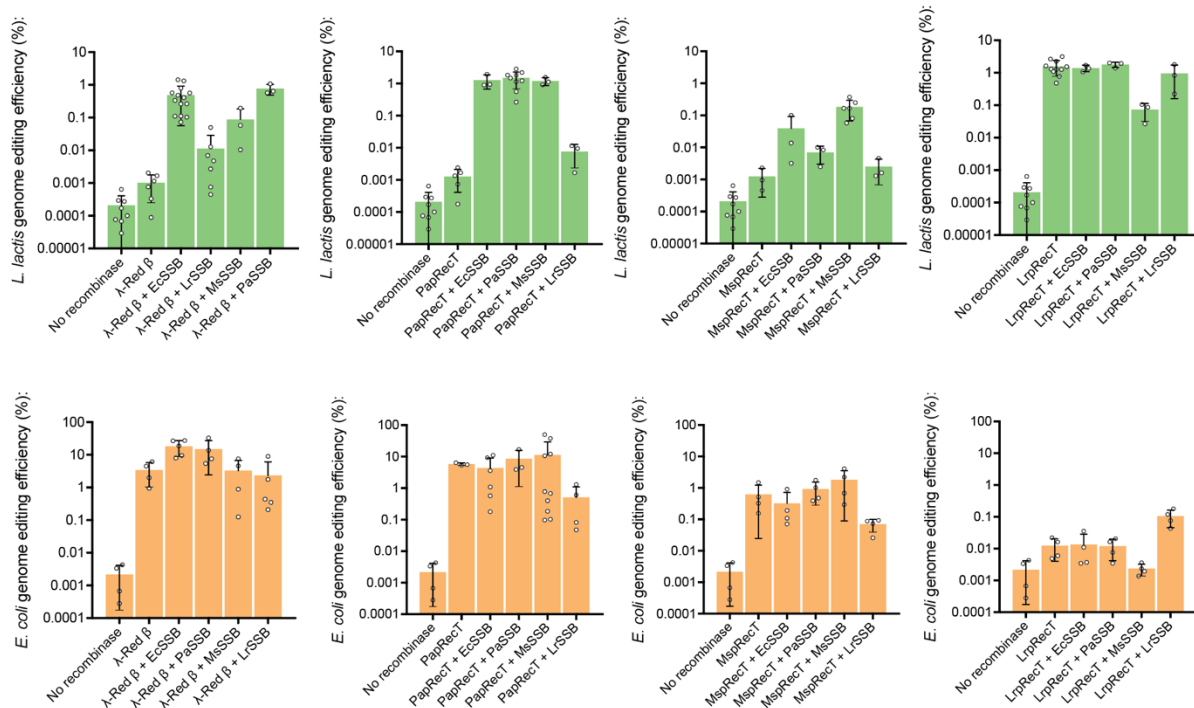

### Supplementary Figure 3.

Bar graphs showing individual data points and SEM for mean values plotted in Fig 3a and Fig 3b. Error bars indicate SD from the mean of at least three biologically independent replicates.

We note there are four cases of SSB co-expression lowering SSAP-mediated genome editing efficiencies. Specifically, LrSSB reduces the activity of MspRecT and PapRecT in *E. coli*, while MsSSB reduces the activity of LrpRecT in *E. coli* and *L. lactis*. We speculate that this may occur if the supplied SSB is close to compatible with the SSAP but not fully compatible. In each of these cases, the 7 amino acid C-terminal tail of a compatible SSB is one amino acid different from that of the supplied SSB (Fig 3c).

We also observe two instances of SSB co-expression improving an otherwise active SSAP (In *E. coli*:  $\lambda$ -Red $\beta$  + EcSSB, and  $\lambda$ -Red $\beta$  + PaSSB). This is unlikely to be caused simply by the reduction in toxicity (Fig S4), as some constructs have significantly reduced toxicities but similar genome editing activities (PapRecT with and without PaSSB).

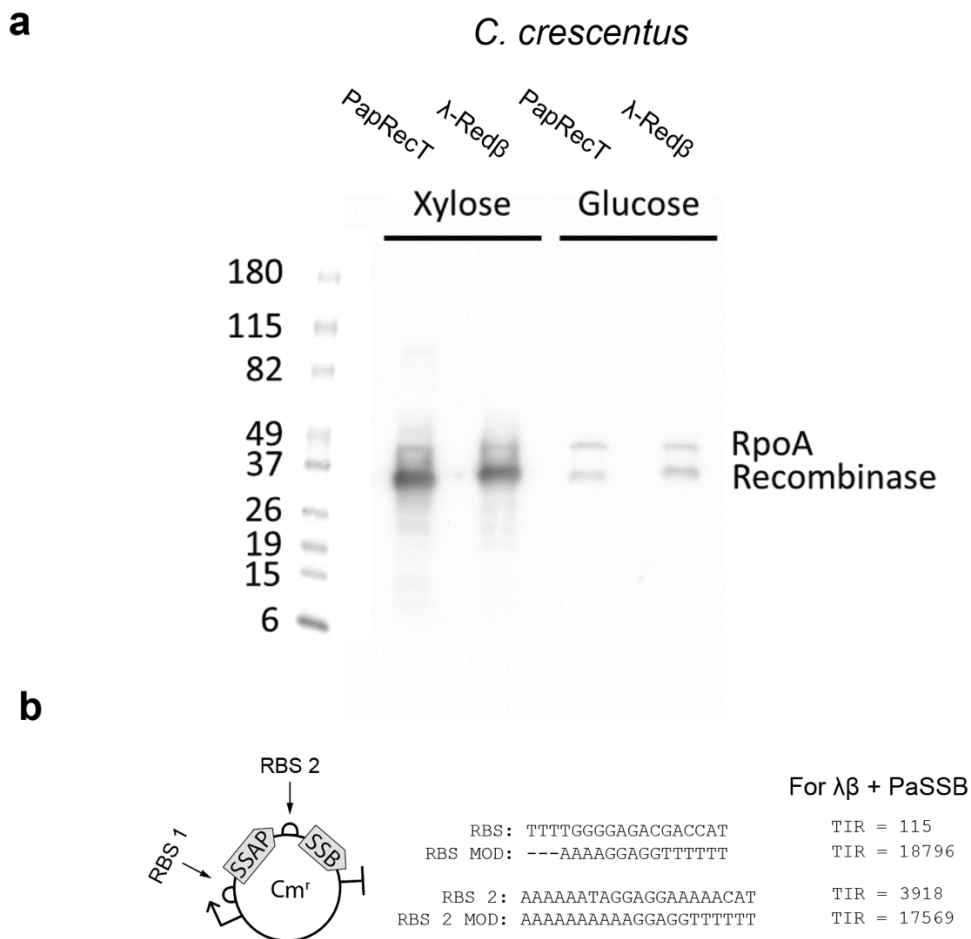

#### Supplementary Figure 4.

(A) Western blot of a 3xFLAG tagged PapRecT and λ-Red β in *C. crescentus* under induced (Xylose) and non-induced (Glucose) conditions, along with a RpoA control. With the 3xFLAG tag, PapRecT should be 31 kDA, while λ-Redβ should be 32.7 kDA, showing that they are both expressed at similar levels under induction conditions. This experiment was performed once to generate the presented gel images.

(B) Using the Salis RBS calculator we designed RBSs conferring a greater translation rate in order to increase SSAP and SSB protein expression for the Caulobacter constructs.<sup>1,2</sup>



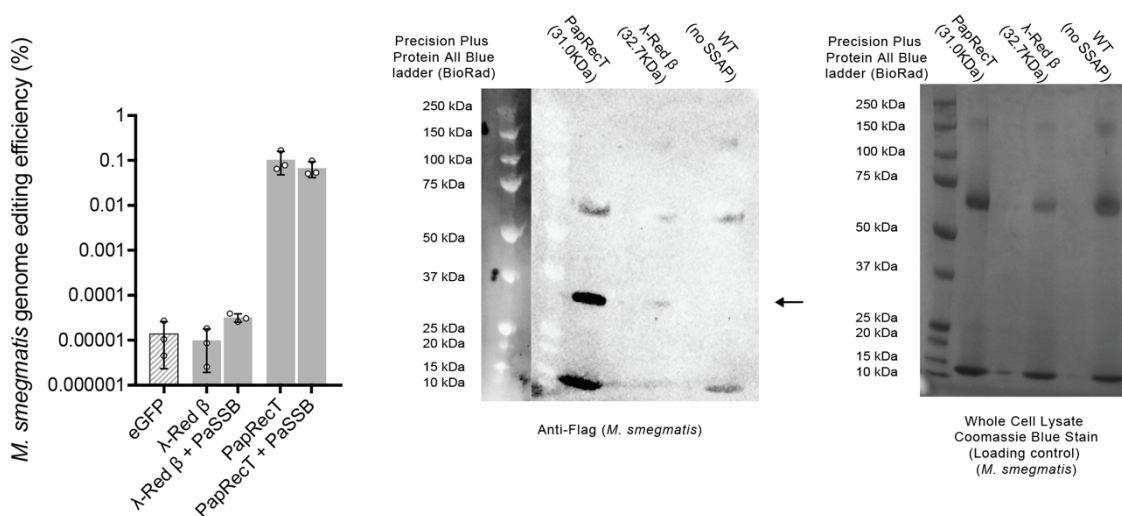

### Supplementary Figure 5.

Recombineering using select SSAPs and SSAP-SSB pairs in *M. smegmatis*. Recombineering using  $\lambda$ -Red $\beta$  + PaSSB is not substantially improved over  $\lambda$ -Red $\beta$  in *M. smegmatis*. PapRecT has basal activity in *M. smegmatis*, and PapRecT + PaSSB performs at approximately the same level. Error bars indicate SD from the mean of at least three biologically independent replicates.

In this case, the lack of any effect of  $\lambda$ -Red $\beta$ , or  $\lambda$ -Red $\beta$  + PaSSB in *M. smegmatis* may be due to far lower expression of  $\lambda$ -Red $\beta$  in the strain, as compared to PapRecT. This protein expression experiment was performed once to generate the presented gel images.



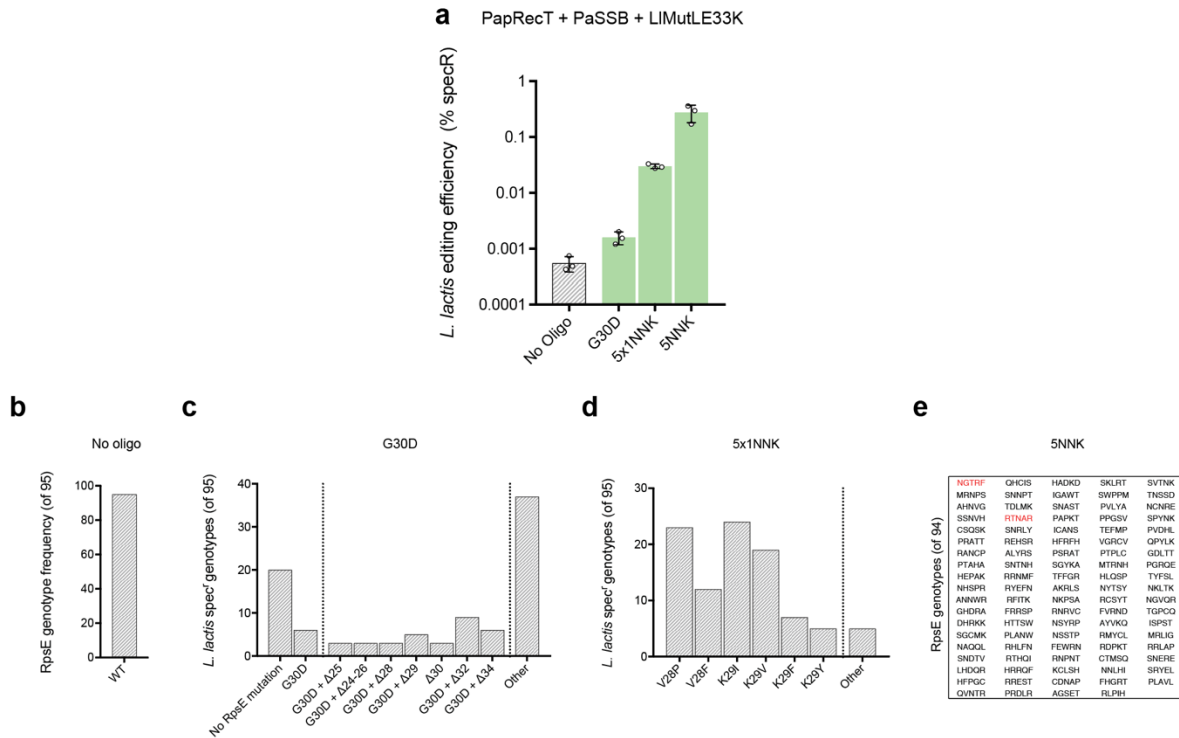

## Supplementary Figure 7.

Preliminary experiment for spectinomycin resistance at *L. lactis* RpsE

(A), Efficiencies of spectinomycin resistance for different oligo designs measured in triplicate. Error bars indicate SD from the mean of at least three biologically independent replicates.

(B-E), Sanger sequencing of spectinomycin resistance mutants.

The amino acid conversion corresponding to a *E. coli* spectinomycin resistant mutant G27D (G30D) did not generate a resistant phenotype in *L. lactis*. The higher rate of resistant alleles using a G30D targeting oligo compared to background levels may be attributed to a rare occurrence of small deletions that occur during mutagenesis (b) which result in a resistant phenotype. Low levels of unintended deletions may be due to oligonucleotide synthesis errors, or an aberrant effect of remaining mismatch repair proteins.<sup>3</sup>

Sanger sequencing results from the 5x1NNK and 5NNK plates reflect allele mutations seen in the next-generation sequencing results

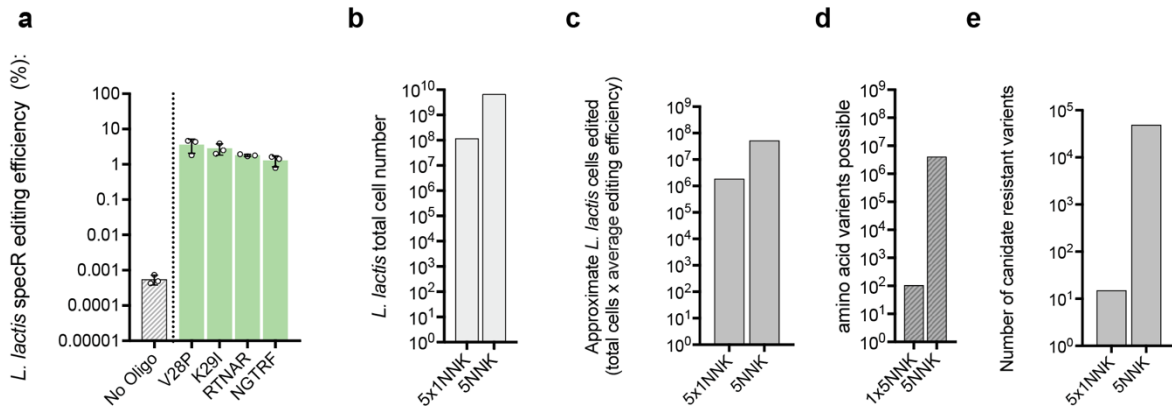

### Supplementary Figure 8.

- (A), Editing efficiency of select 1 amino acid and 5 amino acid variants. Error bars indicate SD from the mean of at least three biologically independent replicates.
- (B), Total cell number after editing with the 5x1NNK oligo library (a single transformation), and the 5NNK oligo library (30 pooled transformations) targeting *L. lactis* RpsE.
- (C). Calculation of expected number of edited cells using the average editing efficiency for 1AA changes and 5AA changes given in (A)
- (D), Number of possible amino acid variants and stop codons in the two libraries (5 x 21 for 1x5NNK), (21<sup>5</sup> for 5NNK)

| Pre-selection 1NNK (WT reads removed) |       |       |       |       |       | Pre-selection 5NNK (WT removed) |       |       |       |       |       |
|---------------------------------------|-------|-------|-------|-------|-------|---------------------------------|-------|-------|-------|-------|-------|
|                                       | NNK1  | NNK2  | NNK3  | NNK4  | NNK5  |                                 | NNK1  | NNK2  | NNK3  | NNK4  | NNK5  |
| D                                     | 0.007 | 0.007 | 0.009 | 0.008 | 0.007 | D                               | 0.035 | 0.034 | 0.037 | 0.036 | 0.036 |
| E                                     | 0.006 | 0.005 | 0.004 | 0.005 | 0.005 | E                               | 0.024 | 0.023 | 0.024 | 0.023 | 0.023 |
| K                                     | 0.009 | 0.786 | 0.008 | 0.009 | 0.009 | K                               | 0.042 | 0.044 | 0.041 | 0.041 | 0.040 |
| R                                     | 0.013 | 0.015 | 0.015 | 0.013 | 0.802 | R                               | 0.064 | 0.073 | 0.064 | 0.067 | 0.074 |
| H                                     | 0.009 | 0.011 | 0.011 | 0.009 | 0.011 | H                               | 0.045 | 0.045 | 0.048 | 0.048 | 0.047 |
| N                                     | 0.013 | 0.017 | 0.014 | 0.015 | 0.014 | N                               | 0.064 | 0.060 | 0.065 | 0.068 | 0.066 |
| Q                                     | 0.005 | 0.008 | 0.006 | 0.006 | 0.006 | Q                               | 0.030 | 0.032 | 0.032 | 0.030 | 0.030 |
| Y                                     | 0.009 | 0.010 | 0.011 | 0.010 | 0.010 | Y                               | 0.046 | 0.044 | 0.047 | 0.049 | 0.050 |
| C                                     | 0.006 | 0.006 | 0.007 | 0.006 | 0.006 | C                               | 0.025 | 0.028 | 0.025 | 0.027 | 0.029 |
| G                                     | 0.007 | 0.006 | 0.797 | 0.798 | 0.006 | G                               | 0.030 | 0.033 | 0.033 | 0.034 | 0.032 |
| S                                     | 0.019 | 0.020 | 0.019 | 0.018 | 0.020 | S                               | 0.090 | 0.090 | 0.087 | 0.089 | 0.090 |
| T                                     | 0.016 | 0.020 | 0.017 | 0.016 | 0.017 | T                               | 0.088 | 0.083 | 0.083 | 0.082 | 0.079 |
| A                                     | 0.012 | 0.010 | 0.009 | 0.011 | 0.009 | A                               | 0.053 | 0.051 | 0.051 | 0.047 | 0.046 |
| M                                     | 0.007 | 0.008 | 0.007 | 0.007 | 0.006 | M                               | 0.033 | 0.033 | 0.032 | 0.031 | 0.032 |
| I                                     | 0.011 | 0.011 | 0.010 | 0.010 | 0.010 | I                               | 0.043 | 0.043 | 0.045 | 0.048 | 0.047 |
| L                                     | 0.018 | 0.019 | 0.017 | 0.017 | 0.019 | L                               | 0.083 | 0.086 | 0.087 | 0.084 | 0.085 |
| V                                     | 0.803 | 0.008 | 0.009 | 0.010 | 0.010 | V                               | 0.048 | 0.043 | 0.045 | 0.045 | 0.043 |
| F                                     | 0.007 | 0.007 | 0.008 | 0.007 | 0.008 | F                               | 0.033 | 0.033 | 0.034 | 0.035 | 0.037 |
| W                                     | 0.004 | 0.004 | 0.004 | 0.004 | 0.003 | W                               | 0.017 | 0.019 | 0.016 | 0.017 | 0.018 |
| P                                     | 0.013 | 0.016 | 0.014 | 0.013 | 0.014 | P                               | 0.074 | 0.074 | 0.073 | 0.067 | 0.065 |
| *                                     | 0.007 | 0.007 | 0.006 | 0.008 | 0.006 | *                               | 0.030 | 0.030 | 0.031 | 0.030 | 0.032 |

### Supplementary Figure 9.

Normalized frequencies of next-generation sequencing reads in the 1x5NNK library, as well as the 5NNK library after editing and 1hr of recovery, before selection with spectinomycin.

**a**

| 5NNK        | Genotype | Resistant 100ug/ml |
|-------------|----------|--------------------|
| 3 AA mutant | VMNRR    | Yes                |
| 2 of 3      | VMNGR    | Yes                |
| 2 of 3      | VMGRR    | No                 |
| 2 of 3      | VKNRR    | Yes                |
| 1 of 3      | VMGGR    | No                 |
| 1 of 3      | VKNGR    | No                 |
| 1 of 3      | VKGRR    | No                 |

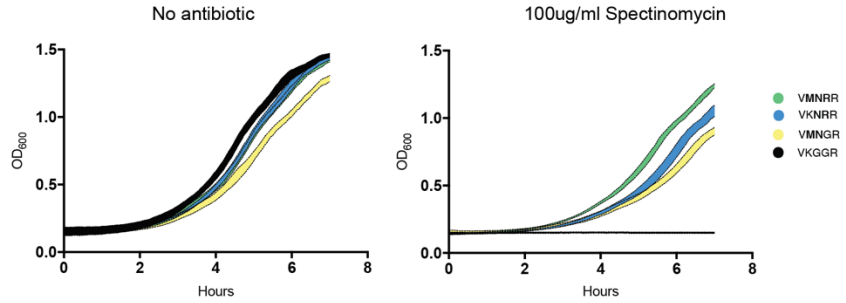

**b**

| 5NNK          | Genotype | Resistant 100ug/ml |
|---------------|----------|--------------------|
| Most enriched | SNNRK    | Yes ●              |
| 3 AA mutant   | RKNNR    | Yes ●              |
| 2 of 3        | RKNGR    | Yes ●              |
| 2 of 3        | RKGNR    | No                 |
| 2 of 3        | VKNNR    | Yes ●              |
| 1 of 3        | RKGGR    | No                 |
| 1 of 3        | VKNGR    | No                 |
| 1 of 3        | VKGNR    | No                 |

  

| 1NNK              | Genotype | Resistant 100ug/ml |
|-------------------|----------|--------------------|
| Most enriched     | PKGGR    | Yes ●              |
| 2nd most enriched | VIGGR    | Yes ●              |

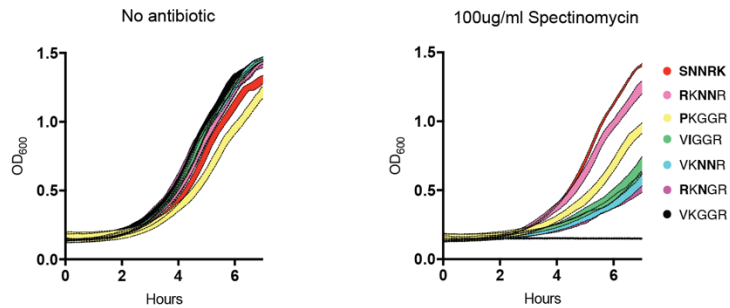

### Supplementary Figure 10.

Doubling times of additional combination mutants and their resistant constituent variants (a, VMNRR) (b, RKNNR, as well as the most enriched variant in the entire pool SNNRK).

The triple mutant VMNRR is more resistant than its two constituent two double mutants (VKNRR, and VMNGR). Neither the remaining double mutant VMGRR nor any of the single mutants grew on 100 µg/mL Spec plates.

SNNRK grew faster in the presence of antibiotic than any of the other variants, and had less of a fitness defect than PKGGR even though all 5 positions are mutated from wildtype. Again, the triple mutant RKNNR was more resistant than its constituent double mutants and none of the signal mutants grew on 100 µg/mL Spec plates.

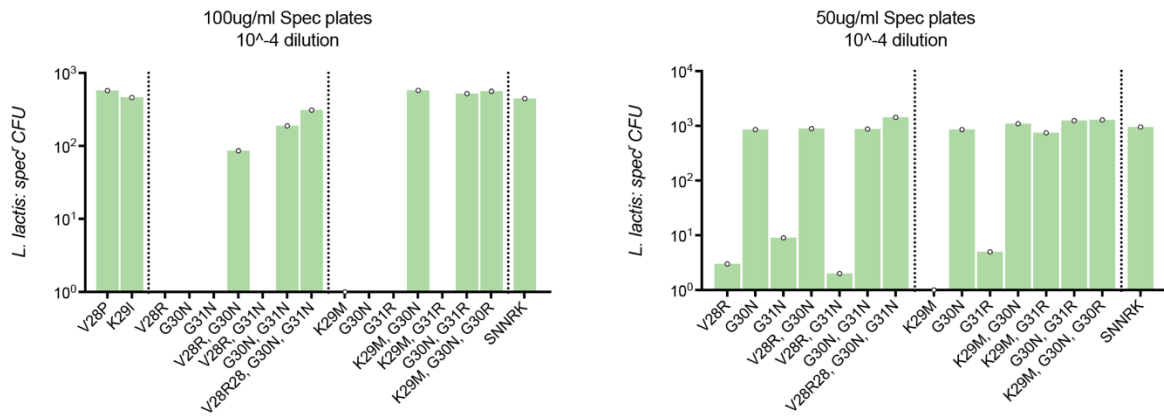

**Supplementary Figure 11.**

Validation of resistance for two genotypes (VMNRR, RKNNR) after two days of growth on 100 µg/mL spectinomycin plates or 50 µg/mL spectinomycin plates.

One of most enriched alleles that appeared in the 5NNK combination mutant library is G30N. This mutation alone did not allow colony formation after 2 days on 100 µg/mL Spec plates, but did on 50 µg/mL Spec plates, indicating that weaker selection pressure may provide additional paths to high resistance phenotypes.

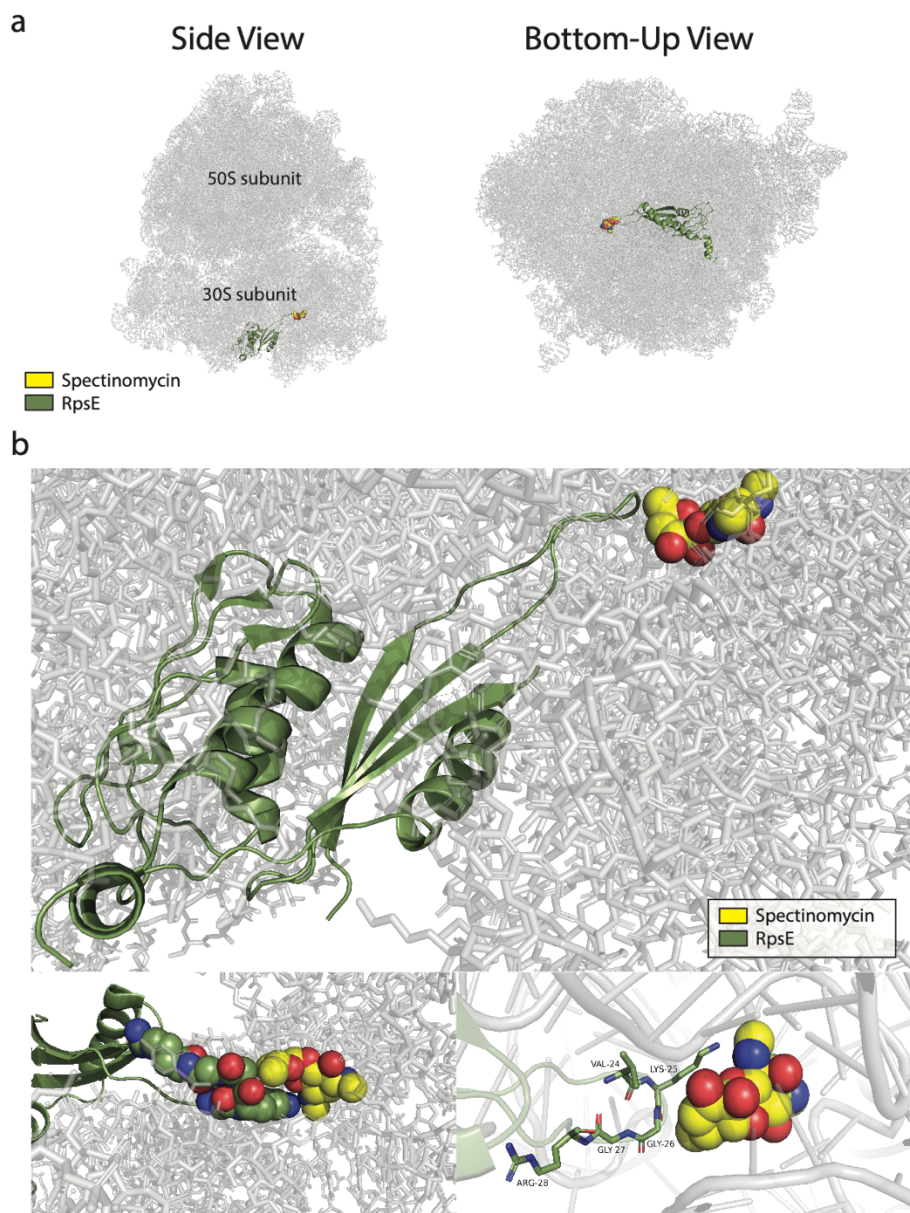

**Supplementary Figure 12.** Structure Supplement. (a) Side (left) and bottom-up (right) views of the *E. coli* ribosome bound to spectinomycin (PDB ID: 4V56). Spectinomycin is shown in yellow spheres, RpsE (the protein product of ribosomal protein S5) in green ribbon, and the rest of the RNA and protein components of the ribosome in gray, partially transparent sticks. (b) The bottom-up view is magnified to show the interaction between RpsE and Spectinomycin. Three different views are shown: (top) the full RpsE protein is visible in green ribbon, (bottom left) the loop that contacts spectinomycin is focused on with the five varied residues shown in green spheres, and (bottom right) this same loop is focused on with residues labeled and shown in green sticks.



### Supplemental References:

1. Espah Borujeni, A., Channarasappa, A. S. & Salis, H. M. Translation rate is controlled by coupled trade-offs between site accessibility, selective RNA unfolding and sliding at upstream standby sites. *Nucleic Acids Res* **42**, 2646–2659 (2014).
2. Salis, H. M., Mirsky, E. A. & Voigt, C. A. Automated design of synthetic ribosome binding sites to control protein expression. *Nature Biotechnology* **27**, 946–950 (2009).
3. Oppenheim, A. B., Rattray, A. J., Bubunenko, M., Thomason, L. C. & Court, D. L. In vivo recombineering of bacteriophage  $\lambda$  by PCR fragments and single-strand oligonucleotides. *Virology* **319**, 185–189 (2004).
